# Supplementary material for: Controlling opioid receptor functional selectivity by targeting distinct subpockets of the orthosteric site
Source: eLife journal article supplement (doi:10.7554/elife.56519), 2021-02-08
Supplement: supp [file elife_poa_e56519_Source_code_1.xls]

## Sheet: TF data
									ANALGESIA DATA FIGURE 5A and 5C
Characterization study: 55oC warm-water tail-withdrawal testing: male C57BL/6J mice.
MP1207: 1 nmol, i.c.v. in 0.5% DMSO/99.5% 0.9% saline
Mouse:	Wt (g):	Pre-T/F (sec):		10 min	%A-10 min	20 min	%A-20 min	30 min	%A-30 min	40 min	%A-40 min	50 min	%A-50 min	60 min	%A-60 min	70 min	%A-70 min	80 min	%A-80 min	90 min	%A-90 min	100 min	%A-100 min	110 min	%A-110 min	120 min	%A-120 min
1	N/R	1.5		5.1	26.67	2.9	10.37	1.5	0	1.2	0	1.3	0	1.2	0
2		1.4		3.8	17.65	2.6	8.82	1.4	0	1.2	0	1.2	0	1.4	0
3		1.4		4	19.12	3.3	13.97	1.1	0	1.7	2.21	1.3	0	1.4	0
4		1.1		2.7	11.51	3.3	15.83	1.8	5.04	1.4	2.16	1.5	2.88	1.7	4.32
5		1.2		3	13.04	1.7	3.62	1.2	0	1.2	0	1.5	2.17	1.2	0
6		1.3		4	19.71	1.9	4.38	2.8	10.95	1.6	2.19	1.7	2.92	1.3	0
7		1.1		3.5	17.27	3.8	19.42	1.5	2.88	1.4	2.16	1.3	1.44	1.3	1.44
8		1.3		2.5	8.76	3.9	18.98	1.3	0	2.1	5.84	1.3	0	1.8	3.65
		1.2875		3.575	16.7163	2.925	11.9238	1.575	2.35875	1.475	1.82	1.3875	1.17625	1.4125	1.17625
		0.0515388		0.298658	1.97718	0.288314	2.16852	0.190629	1.39571	0.111403	0.689433	0.0580563	0.473113	0.0789156	0.64073
		8		8	8	8	8	8	8	8	8	8	8	8	8
		t-test to pre T/F:		5.48275e-05		0.000957824		0.167479		0.148904		0.218587		0.206005
MP1207: 3 nmol, i.c.v. in 50% DMSO/50% 0.9% saline
Mouse:	Wt (g):	Pre-T/F (sec):		10 min	%A-10 min	20 min	%A-20 min	30 min	%A-30 min	40 min	%A-40 min	50 min	%A-50 min	60 min	%A-60 min	70 min	%A-70 min	80 min	%A-80 min	90 min	%A-90 min	100 min	%A-100 min	110 min	%A-110 min	120 min	%A-120 min
1	N/R	1.4		3.9	18.38	3.8	17.65	2.6	8.82	2	4.41	1.6	1.47	1.5	0.74
2		1.2		5.4	30.43	2.7	10.87	1.9	5.07	1.8	4.35	1.5	2.17	1.8	4.35
3		1.4		2.9	11.03	1.6	1.47	2.3	6.62	1.3	0	1.5	0.74	1.2	0
4		1.5		3.2	12.59	3.1	11.85	1.9	2.96	1.4	0	1.5	0	1.6	0.74
5		1.5		3.9	17.78	2.2	5.19	1.7	1.48	1.6	0.74	1.4	0	1.3	0
6		1.2		4.1	21.01	2.4	8.7	2.4	8.7	1.3	0.72	1.2	0	1.3	0.72
7		1.3		2	5.11	1.7	2.92	1.8	3.65	1.3	0	1.3	0	1.3	0
8		1.1		1.7	4.32	1.4	2.16	1.7	4.32	1.3	1.44	1.4	2.16	1.4	2.16
		1.325		3.3875	15.0813	2.3625	7.60125	2.0375	5.2025	1.5	1.4575	1.425	0.8175	1.425	1.08875
		0.0526104		0.425289	3.06696	0.289666	2.00824	0.122383	0.93942	0.0963624	0.66165	0.0453163	0.346836	0.0700765	0.529803
		8		8	8	8	8	8	8	8	8	8	8	8	8
		t-test to pre T/F:		0.00180144		0.006732		0.000102714		0.133263		0.171808		0.272934
MP1207: 10 nmol, i.c.v. in 5% DMSO/95% 0.9% saline
Mouse:	Wt (g):	Pre-T/F (sec):		10 min	%A-10 min	20 min	%A-20 min	30 min	%A-30 min	40 min	%A-40 min	50 min	%A-50 min	60 min	%A-60 min	70 min	%A-70 min	80 min	%A-80 min	90 min	%A-90 min	100 min	%A-100 min	110 min	%A-110 min	120 min	%A-120 min
1	N/R	1.3		10.8	69.34	7.4	44.53	3.6	16.79	3	12.41	1.3	0	1.2	0	1.1	0
2		1.3		5.6	31.39	6.3	36.5	1.9	4.38	1.7	2.92	1.2	0	1.3	0	1.4	0.73
3		1.6		3.4	13.43	3.3	12.69	1.8	1.49	1.9	2.24	1.7	0.75	1.7	0.75	1.9	2.24
4		1.4		15	100	11.5	74.26	15	100	5.8	32.35	1.4	0	1.6	1.47	1.3	0
5		1.1		15	100	15	100	3.7	18.71	4.9	27.34	1.3	1.44	1.3	1.44	1.2	0.72
6		1.3		9.7	61.31	6.8	40.15	3.9	18.98	4.2	21.17	1.4	0.73	1.2	0	1.6	2.19
7		1.2		15	100	15	100	3.2	14.49	6.6	39.13	1.3	0.72	1.4	1.45	1	0
8		1.3		15	100	5.9	33.58	4.9	26.28	2.4	8.03	1.4	0.73	1.3	0	1.8	3.65
		1.3125		11.1875	71.9338	8.9	55.2137	4.75	25.14	3.8125	18.1988	1.375	0.54625	1.375	0.63875	1.4125	1.19125
		0.0515388		1.64951	12.2014	1.55242	11.4501	1.50867	11.0664	0.652314	4.92044	0.0526104	0.18093	0.0647798	0.254793	0.115631	0.478743
		8		8	8	8	8	8	8	8	8	8	8	8	8	8	8
		t-test to pre T/F:		0.000620619		0.00203237		0.0390001		0.00187306		0.410366		0.462759		0.442755
MP1207: 30 nmol, i.c.v. in 50% DMSO/50% 0.9% saline
Mouse:	Wt (g):	Pre-T/F (sec):		10 min	%A-10 min	20 min	%A-20 min	30 min	%A-30 min	40 min	%A-40 min	50 min	%A-50 min	60 min	%A-60 min	70 min	%A-70 min	80 min	%A-80 min	90 min	%A-90 min	100 min	%A-100 min	110 min	%A-110 min	120 min	%A-120 min
1	N/R	1.3		3.4	15.33	15	100	5.6	31.39	2.2	6.57	1.8	3.65	1.1	0	1.3	0	1.2	0
2		1.3		15	100	15	100	14.3	94.89	9.5	59.85	4.9	26.28	1.6	2.19	1.5	1.46	1.7	2.92
3		1.9		15	100	15	100	15	100	12.3	79.39	6.8	37.4	2.8	6.87	1.7	0	1.6	0
4		1.2		15	100	15	100	15	100	5.2	28.99	7.5	45.65	1.4	1.45	1.1	0	1.1	0
5		1.2		15	100	15	100	15	100	10.6	68.12	7.4	44.93	4.4	23.19	2.7	10.87	1.5	2.17
6		1.4		15	100	15	100	10.1	63.97	2.3	6.62	4.8	25	1.8	2.94	1.7	2.21	1.7	2.21
7		1.3		15	100	6.3	36.5	6.4	37.23	2.9	11.68	4.3	21.9	1.9	4.38	1.4	0.73	1.2	0
8		1.5		15	100	15	100	15	100	9.9	62.22	4.5	22.22	2	3.7	1.6	0.74	1.4	0
		1.3875		13.55	89.4162	13.9125	92.0625	12.05	78.435	6.8625	40.43	5.25	28.3788	2.125	5.59	1.625	2.00125	1.425	0.9125
		0.0811469		1.45	10.5838	1.0875	7.9375	1.44667	10.5655	1.46835	10.6768	0.678496	4.92961	0.369725	2.61658	0.169821	1.29706	0.0839855	0.452338
		8		8	8	8	8	8	8	8	8	8	8	8	8	8	8	8	8
		t-test to pre T/F:		6.42753e-05		7.89376e-06		3.57126e-06		0.00227154		5.96572e-05		0.0717059		0.227615		0.752873
MP1207: 100 nmol, i.c.v. in 50% DMSO/50% saline, 0.9%
Mouse:	Wt (g):	Pre-T/F (sec):		10 min	%A-10 min	20 min	%A-20 min	30 min	%A-30 min	40 min	%A-40 min	50 min	%A-50 min	60 min	%A-60 min	70 min	%A-70 min	80 min	%A-80 min	90 min	%A-90 min	100 min	%A-100 min	110 min	%A-110 min	120 min	%A-120 min
1	N/R	1.4		15	100	15	100	15	100	15	100	9.4	58.82	9.9	62.5	4.7	24.26	3.2	13.24	2.7	9.56	1.8	2.94
2		1.8		15	100	15	100	15	100	15	100	5.3	26.52	4.7	21.97	2.8	7.58	1.6	0	1.4	0	1.5	0
3		1.3		15	100	6.3	36.5	15	100	15	100	6.2	35.77	3.3	14.6	2.3	7.3	2	5.11	1.4	0.73	1.6	2.19
4		1.6		15	100	15	100	15	100	12.8	83.58	9.7	60.45	6.2	34.33	3.4	13.43	1.7	0.75	2.1	3.73	1.4	0
5		1.4		15	100	15	100	9.8	61.76	6.4	36.76	10.2	64.71	3	11.76	2.4	7.35	1.6	1.47	1.4	0	1.5	0.74
6		1.5		15	100	15	100	7.7	45.93	3.5	14.81	4.3	20.74	3	11.11	3.1	11.85	1.8	2.22	1.4	0	1.5	0
7		1.2		15	100	15	100	15	100	4.9	26.81	8.6	53.62	5.7	32.61	5.4	30.43	1.7	3.62	1.3	0.72	1.3	0.72
8		1.3		15	100	15	100	13.4	88.32	15	100	15	100	6.7	39.42	5.8	32.85	1.6	2.19	1.5	1.46	1.2	0
		1.4375		15	100	13.9125	92.0625	13.2375	87.0012	10.95	70.245	8.5875	52.5787	5.3125	28.5375	3.7375	16.8812	1.9	3.575	1.65	2.025	1.475	0.82375
		0.0679745		0	0	1.0875	7.9375	1.01804	7.52442	1.80198	13.2289	1.19902	8.93752	0.834831	6.18842	0.485481	3.77822	0.191796	1.49234	0.174233	1.16254	0.0647798	0.402607
		8		8	8	8	8	8	8	8	8	8	8	8	8	8	8	8	8	8	8	8	8
		t-test to pre T/F:		2.09692e-14		7.70647e-06		1.50001e-08		0.000117349		3.52542e-05		0.000392308		0.000346523		0.0393173		0.27494		0.695649
									FIGURE 5D
MOR AGONIST SELECTIVITY TEST: MOR KO MICE: MP1207: 100 nmol I.c.v. in 50% DMSO
Mouse:	Wt (g):	Pre-T/F (sec):		10 min	%A-10 min	20 min	%A-20 min	30 min	%A-30 min	40 min	%A-40 min	50 min	%A-50 min	60 min	%A-60 min	70 min	%A-70 min	80 min	%A-80 min	90 min	%A-90 min	100 min	%A-100 min	110 min	%A-110 min
1	N/R	1		7.3	45	4.7	26.43	2.3	9.29	1.8	5.71	2.2	8.57	1.6	4.29	1.7	5	1.9	6.43
2		1.5		2.9	10.37	3.2	12.59	2.1	4.44	2.1	4.44	3.1	11.85	1.5	0	1.4	0	1.4	0
3		1.3		3.4	15.33	7.1	42.34	2.8	10.95	2.3	7.3	2.5	8.76	2	5.11	1.2	0	1.1	0
4		1.2		4.2	21.74	2.4	8.7	2.6	10.14	2.8	11.59	1.8	4.35	1.5	2.17	1.4	1.45	1.3	0.72
5		1.4		2.8	10.29	2	4.41	1.6	1.47	1.8	2.94	1.4	0	1.1	0	1.1	0	1.2	0
6		1.2		1.9	5.07	3.7	18.12	2	5.8	1.7	3.62	1.5	2.17	1.2	0	1.3	0.72	1.2	0
7		1.4		2.9	11.03	1.9	3.68	1.8	2.94	2.6	8.82	1.8	2.94	1.6	1.47	2	4.41	1.3	0
8		1		3.7	19.29	3.1	15	2.4	10	2.2	8.57	1.5	3.57	1.3	2.14	1.3	2.14	1.4	2.86
		1.25		3.6375	17.265	3.5125	16.4088	2.2	6.87875	2.1625	6.62375	1.975	5.27625	1.475	1.8975	1.425	1.715	1.35	1.25125
		0.0654654		0.576299	4.39335	0.608111	4.54691	0.142678	1.30005	0.140073	1.0516	0.208524	1.41997	0.0995526	0.696439	0.103078	0.708605	0.0866025	0.818512
		8		8	8	8	8	8	8	8	8	8	8	8	8	8	8	8	8
Notes:		t-test to pre T/F:		0.00622944		0.0086076		2.97845e-05		3.85666e-05		0.00508536		0.0798714		0.17377		0.372582
			t-test to WT MP1207 (100 nmol):		2.42747e-11		9.28127e-07		5.13113e-08		0.000285686		0.000128104		0.000765739		0.00146513		0.193713
KOR AGONIST SELECTIVITY TEST: KOR KO MICE: MP1207: 100 nmol I.c.v. in 50% DMSO
Mouse:	Wt (g):	Pre-T/F (sec):		10 min	%A-10 min	20 min	%A-20 min	30 min	%A-30 min	40 min	%A-40 min	50 min	%A-50 min	60 min	%A-60 min	70 min	%A-70 min	80 min	%A-80 min	90 min	%A-90 min	100 min	%A-100 min	110 min	%A-110 min
1		1.3		8.9	55.47	15	100	9.7	61.31	5.8	32.85	5.5	30.66	7.5	45.26	3	12.41	1.5	1.46	2	5.11	1.7	2.92	1.4	0.73
2		1.3		15	100	15	100	6.6	38.69	5.6	31.39	7.5	45.26	3.1	13.14	4	19.71	2.4	8.03	1.7	2.92	1.3	0	1.3	0
3		1.7		15	100	6.3	34.59	4.6	21.8	3.6	14.29	3.2	11.28	2.2	3.76	2.4	5.26	1.9	1.5	1.5	0	1.8	0.75	1.7	0
4		1.4		15	100	6.4	36.76	7.5	44.85	3.7	16.91	5.1	27.21	3.1	12.5	4.1	19.85	5.6	30.88	1.5	0.74	1.6	1.47	1.5	0.74
5		1.1		8.4	52.52	3.3	15.83	3.4	16.55	3.3	15.83	2.5	10.07	2	6.47	1.6	3.6	1.4	2.16	1.2	0.72	1.4	2.16	1.2	0.72
6		1.7		14.8	98.5	4.8	23.31	4.6	21.8	3.4	12.78	6	32.33	1.8	0.75	2.7	7.52	3.4	12.78	1.6	0	1.5	0	1.7	0
7		2.2		1.8	0	1	0	2.2	0	3.2	7.81	1.3	0	3	6.25	1.8	0	2.7	3.91	2.3	0.78
8		1.8		1.9	0.76	2.7	6.82	2.4	4.55	2.7	6.82	2.6	6.06	2	1.52	3.2	10.61	2.9	8.33	1.9	0.76
		1.5625		10.1	63.4062	6.8125	39.6638	5.125	26.1938	3.9125	17.335	4.2125	20.3588	3.0875	11.2062	2.85	9.87	2.725	8.63125	1.7125	1.37875	1.55	1.21667	1.46667	0.365
		0.125268		2.04669	15.4546	1.89731	13.8889	0.928276	7.34791	0.404633	3.46414	0.749866	5.54793	0.65858	5.12464	0.325137	2.55975	0.477998	3.4824	0.121652	0.622249	0.0763763	0.484208	0.0843274	0.163253
		8		8	8	8	8	8	8	8	8	8	8	8	8	8	8	8	8	8	8	6	6	6	6
Notes:		t-test to pre T/F:		0.00489128		0.0323512		0.00193819		7.18123e-05		0.0036374		0.0391755		0.00240048		0.0337972		0.404796		0.93903		0.567294
			t-test to WT MP1207 (100 nmol):		0.032828		0.00552491		4.75211e-05		0.00170214		0.00843117		0.048874		0.14675		0.20332		0.631652		0.541837		#DIV/0!
DOR AGONIST SELECTIVITY TEST: DOR KO MICE:MP1207: 100 nmol I.c.v. in 50% DMSO
Mouse:	Wt (g):	Pre-T/F (sec):		10 min	%A-10 min	20 min	%A-20 min	30 min	%A-30 min	40 min	%A-40 min	50 min	%A-50 min	60 min	%A-60 min	70 min	%A-70 min	80 min	%A-80 min	90 min	%A-90 min	100 min	%A-100 min	110 min	%A-110 min
1	N/R	1.8		15	100	15	100	15	100	15	100	10	62.12	10	62.12	3.2	10.61	2.5	5.3	2.2	3.03	1.6	0	1.3	0
2		1.5		15	100	13.9	91.85	15	100	8.5	51.85	3.8	17.04	9	55.56	2.8	9.63	2.5	7.41	2	3.7	1.8	2.22	1.8	2.22
3		1.8		15	100	15	100	15	100	6.9	38.64	6.5	35.61	5.1	25	4.5	20.45	2.7	6.82	1.5	0	1.4	0	1.6	0
4		1.6		15	100	12.9	84.33	15	100	4.7	23.13	15	100	15	100	3.4	13.43	2.9	9.7	1.4	0	1.7	0.75	1.8	1.49
5		1.6		15	100	15	100	15	100	7.7	45.52	5.5	29.1	6.5	36.57	2.4	5.97	2.2	4.48	1.1	0	1.9	2.24	1.4	0
6		1.3		15	100	15	100	15	100	13.6	89.78	6.5	37.96	6.3	36.5	4	19.71	2.1	5.84	2	5.11	1.4	0.73	1.4	0.73
7		2		3.9	14.62	4.7	20.77	3.8	13.85	3.6	12.31	4.3	17.69	4.2	16.92	3.2	9.23	3.5	11.54	1.8	0	3.8	13.85	1.9	0
8		1.8		2.7	6.82	2.7	6.82	3.7	14.39	3.4	12.12	2.8	7.58	3.3	11.36	4	16.67	4.1	17.42	3.6	13.64	1.8	0	1.7	0
		1.675		12.075	77.68	11.775	75.4713	12.1875	78.53	7.925	46.6687	6.8	38.3875	7.425	43.0038	3.4375	13.2125	2.8125	8.56375	1.95	3.185	1.925	2.47375	1.6125	0.555
		0.0773443		1.91822	14.6304	1.79182	13.666	1.84124	14.0555	1.5427	11.744	1.40535	10.5954	1.34586	10.2305	0.244903	1.86376	0.240117	1.5101	0.268594	1.65766	0.275649	1.65782	0.0789156	0.305228
		8		8	8	8	8	8	8	8	8	8	8	8	8	8	8	8	8	8	8	8	8	8	8
Notes:		t-test to pre T/F:		0.00113922		0.00091151		5.44299e-05		0.001202		0.00267065		0.000784489		7.77521e-06		0.000490556		0.341878		0.39727		0.580604
			t-test to WT MP1207 (100 nmol):		0.149383		0.311587		0.603504		0.203893		0.323301		0.246352		0.398531		0.0339785		0.57578		0.34987		#DIV/0!
											FIGURE 5A AND 5C
MP1208: 1 nmol, i.c.v. in 0.5% DMSO/99.5% 0.9% saline
Mouse:	Wt (g):	Pre-T/F (sec):		10 min	%A-10 min	20 min	%A-20 min	30 min	%A-30 min	40 min	%A-40 min	50 min	%A-50 min	60 min	%A-60 min	70 min	%A-70 min	80 min	%A-80 min	90 min	%A-90 min	100 min	%A-100 min	110 min	%A-110 min	120 min
1	N/R	1.2		2.1	6.52	2.8	11.59	1.3	0.72	1.1	0	1.3	0.72	1.2	0
2		1.4		2.4	7.35	3.6	16.18	1.3	0	1.3	0	1.3	0	1.2	0
3		1.4		2.2	5.88	1.7	2.21	1.6	1.47	1.1	0	1.4	0	1.7	2.21
4		1.3		1.9	4.38	1.7	2.92	1.3	0	1.2	0	1.3	0	1.2	0
5		1.6		2.3	5.22	1.7	0.75	1.5	0	1.8	1.49	1.4	0	1.2	0
6		1.4		3.1	12.5	1.7	2.21	1.4	0	1.6	1.47	1.4	0	1.5	0.74
7		1.4		3	11.76	2.2	5.88	1.1	0	1.3	0	1.3	0	1.2	0
8		1.1		1.9	5.76	1.2	0.72	1.2	0.72	1.2	0.72	1.4	2.16	1.3	1.44
		1.35		2.3625	7.42125	2.075	5.3075	1.3375	0.36375	1.325	0.46	1.35	0.36	1.3125	0.54875
		0.0534522		0.1625	1.07459	0.273698	2.00318	0.0564975	0.195448	0.0881354	0.239292	0.0188982	0.272134	0.0666481	0.301671
		8		8	8	8	8	8	8	8	8	8	8	8	8
		t-test to pre T/F:		0.000221323		0.0329942		0.874612		0.811882		1		0.66741
MP1208: 3 nmol, i.c.v. in 50% DMSO/50% 0.9% saline
Mouse:	Wt (g):	Pre-T/F (sec):		10 min	%A-10 min	20 min	%A-20 min	30 min	%A-30 min	40 min	%A-40 min	50 min	%A-50 min	60 min	%A-60 min	70 min	%A-70 min	80 min	%A-80 min	90 min	%A-90 min	100 min	%A-100 min	110 min	%A-110 min	120 min
1	N/R	1.5		4.9	25.19	4.2	20	4	18.52	4.6	22.96	2.7	8.89	1.9	2.96
2		1.3		4.1	20.44	3.8	18.25	2.4	8.03	1.6	2.19	1.4	0.73	1.1	0
3		1.4		2.8	10.29	2.8	10.29	3	11.76	1.4	0	1.4	0	1.6	1.47
4		1		2.3	9.29	3.2	15.71	2.2	8.57	1.6	4.29	1.2	1.43	1.4	2.86
5		1.2		2.9	12.32	4.1	21.01	1.9	5.07	1.4	1.45	1.5	2.17	1.4	1.45
6		1.5		6.6	37.78	2.7	8.89	3.2	12.59	1.8	2.22	1.2	0	1.5	0
7		1.5		2.3	5.93	3.5	14.81	1.8	2.22	1.4	0	1.5	0	1.6	0.74
8		1.5		2.2	5.19	3.3	13.33	1.5	0	1.2	0	1.4	0	1.2	0
		1.3625		3.5125	15.8038	3.45	15.2863	2.5	8.345	1.875	4.13875	1.5375	1.6525	1.4625	1.185
		0.0652947		0.556596	3.98134	0.197303	1.54615	0.297009	2.11813	0.394493	2.73978	0.171065	1.07299	0.0885145	0.433392
		8		8	8	8	8	8	8	8	8	8	8	8	8
		t-test to pre T/F:		0.0051258		2.53295e-05		0.0021941		0.22077		0.355414		0.378653
MP1208: 10 nmol, i.c.v. in 5% DMSO/95% 0.9% saline
Mouse:	Wt (g):	Pre-T/F (sec):		10 min	%A-10 min	20 min	%A-20 min	30 min	%A-30 min	40 min	%A-40 min	50 min	%A-50 min	60 min	%A-60 min	70 min	%A-70 min	80 min	%A-80 min	90 min	%A-90 min	100 min	%A-100 min	110 min	%A-110 min	120 min
1	N/R	1.2		12.4	81.16	4.3	22.46	3.9	19.57	1.8	4.35	1.4	1.45	1.5	2.17	1.3	0.72
2		1.3		5.4	29.93	4	19.71	2.9	11.68	1.8	3.65	1.3	0	1.2	0	1.7	2.92
3		1.3		15	100	6.4	37.23	4.3	21.9	3.6	16.79	6.7	39.42	1.4	0.73	1.3	0
4		1.2		8.1	50	4.9	26.81	2.3	7.97	1.7	3.62	1.6	2.9	1.2	0	1.2	0
5		1.5		15	100	15	100	5.3	28.15	3.2	12.59	4.5	22.22	1.4	0	1.5	0
6		1.3		9.1	56.93	6	34.31	7.3	43.8	1.5	1.46	1.4	0.73	1.2	0	1.2	0
7		1.4		5.1	27.21	2.1	5.15	2.7	9.56	1.7	2.21	1.2	0	1.4	0	1.2	0
8		1.3		9.1	56.93	4.2	21.17	2.5	8.76	1.7	2.92	1.3	0	1.1	0	1.3	0
		1.3125		9.9	62.77	5.8625	33.355	3.9	18.9237	2.125	5.94875	2.425	8.34	1.3	0.3625	1.3375	0.455
		0.0350382		1.37633	10.0753	1.38589	10.1323	0.607101	4.38477	0.282685	1.97395	0.724507	5.1794	0.05	0.273553	0.0625	0.363234
		8		8	8	8	8	8	8	8	8	8	8	8	8	8	8
		t-test to pre T/F:		0.000417962		0.0125006		0.000800379		0.0127893		0.147379		0.840726		0.732348
MP1208: 30 nmol, i.c.v. in 50% DMSO/50% 0.9% saline
Mouse:	Wt (g):	Pre-T/F (sec):		10 min	%A-10 min	20 min	%A-20 min	30 min	%A-30 min	40 min	%A-40 min	50 min	%A-50 min	60 min	%A-60 min	70 min	%A-70 min	80 min	%A-80 min	90 min	%A-90 min	100 min	%A-100 min	110 min	%A-110 min	120 min
1	N/R	1.3		3.1	13.14	3.8	18.25	1.9	4.38	1.5	1.46	1.6	2.19	1.4	0.73
2		1.4		11	70.59	4.3	21.32	3.5	15.44	1.5	0.74	1.8	2.94	1.4	0
3		1.3		6.3	36.5	3.6	16.79	5.9	33.58	1.5	1.46	1.3	0	1.9	4.38
4		1.2		3.9	19.57	4.6	24.64	5.3	29.71	4.2	21.74	1.5	2.17	4.9	26.81
5		1.6		3.7	15.67	4.7	23.13	3.9	17.16	2.3	5.22	1.4	0	1.3	0
6		1.3		9.5	59.85	7.7	46.72	14.1	93.43	5.9	33.58	1.1	0	1.3	0
7		1.4		9.5	59.56	7.6	45.59	11	70.59	10.5	66.91	1.6	1.47	1.8	2.94
8		1.5		3.8	17.04	3.5	14.81	4.1	19.26	1.7	1.48	1.2	0	1.4	0
8	N/R	1.3		15	100	15	100	9.5	59.85	5.8	32.85	5.8	32.85	1.7	2.92	2.1	5.84	1.8	3.65	2.4	8.03
8		1.4		15	100	15	100	6.7	38.97	4.9	25.74	2	4.41	1.5	0.74	1.4	0	1.2	0	1.3	0
8		1.2		9.8	62.32	8	49.28	5.6	31.88	3.9	19.57	2.4	8.7	1.4	1.45	1.5	2.17	1.3	0.72	1.1	0
8		1.5		15	100	15	100	7.6	45.19	5.1	26.67	2.3	5.93	1.5	0	1.4	0	1.2	0	1.3	0
8		1.2		15	100	5.3	29.71	3.3	15.22	2.4	8.7	2.2	7.25	1.3	0.72	1.3	0.72	1	0	1.3	0.72
8		1.5		15	100	15	100	6.3	35.56	3.8	17.04	5.1	26.67	2.2	5.19	1.4	0	1.7	1.48	1.4	0
8		1.3		15	100	15	100	6.5	37.96	3.1	13.14	2.9	11.68	1.9	4.38	1.4	0.73	1.2	0	1	0
8		1.1		15	100	3.9	20.14	1.7	4.32	2.6	10.79	1.5	2.88	1.2	0.72	1.1	0	1.2	0.72	1.4	2.16
		1.34375		10.35	65.89	8.25	50.6487	6.05625	34.5313	3.79375	17.9431	2.23125	6.82125	1.75625	3.18625	1.45	1.1825	1.325	0.82125	1.4	1.36375
		0.0341184		1.20972	8.88728	1.2277	8.98245	0.825932	6.01451	0.587329	4.3066	0.338221	2.4099	0.220788	1.63686	0.10177	0.715633	0.0977424	0.446296	0.151186	0.989105
		16		16	16	16	16	16	16	16	16	16	16	16	16	8	8	8	8	8	8
		t-test to pre T/F:		2.19614e-06		4.51711e-05		3.22611e-06		0.000242582		0.0139661		0.0747226		0.248053		0.911538		0.592455
MP1208: 100 nmol, i.c.v. in 50% DMSO/50% 0.9% saline
Mouse:	Wt (g):	Pre-T/F (sec):		10 min	%A-10 min	20 min	%A-20 min	30 min	%A-30 min	40 min	%A-40 min	50 min	%A-50 min	60 min	%A-60 min	70 min	%A-70 min	80 min	%A-80 min	90 min	%A-90 min	100 min	%A-100 min	110 min	%A-110 min	120 min
1	N/R	1.2		8.6	53.62	15	100	15	100	6.8	40.58	6.6	39.13	3.3	15.22	2.2	7.25	1.8	4.35	1.1	0	2.2	7.25
2		1.2		11.1	71.74	15	100	15	100	12.6	82.61	5.2	28.99	4.3	22.46	2.2	7.25	2.1	6.52	1.4	1.45	1.5	2.17
3		1.4		6.8	39.71	5	26.47	6.1	34.56	4	19.12	4.7	24.26	3.7	16.91	1.8	2.94	1.3	0	1.2	0	1.2	0
4		1.7		9.8	60.9	15	100	12.6	81.95	3.7	15.04	4.1	18.05	5.9	31.58	2.1	3.01	1.4	0	1.3	0	1.2	0
5		1.4		15	100	15	100	15	100	7.9	47.79	2.9	11.03	7.8	47.06	3.4	14.71	1.4	0	1.3	0	1.5	0.74
6		1.3		15	100	15	100	15	100	10.6	67.88	3.2	13.87	5.9	33.58	1.7	2.92	1.1	0	1.5	1.46	1.3	0
7		1.1		15	100	15	100	15	100	4.3	23.02	5.2	29.5	2.7	11.51	2.3	8.63	1.4	2.16	1.2	0.72	1.2	0.72
8		1.1		15	100	15	100	8.2	51.08	15	100	10.3	66.19	3.5	17.27	1.6	3.6	1.4	2.16	1.2	0.72	1.3	1.44
		1.3		12.0375	78.2463	13.75	90.8088	12.7375	83.4488	8.1125	49.505	5.275	28.8775	4.6375	24.4488	2.1625	6.28875	1.4875	1.89875	1.275	0.54375	1.425	1.54
		0.0707107		1.19701	8.79084	1.25	9.19125	1.26955	9.26766	1.50267	11.0829	0.831039	6.23935	0.612646	4.2477	0.199049	1.45645	0.110901	0.865222	0.0453163	0.227784	0.119149	0.860214
		8		8	8	8	8	8	8	8	8	8	8	8	8	8	8	8	8	8	8	8	8
		t-test to pre T/F:		5.10774e-05		2.39082e-05		3.41053e-07		0.000472632		0.000301258		9.16506e-05		0.00111842		0.175906		0.770326		0.382214
										FIGURE 5E
MOR AGONIST SELECTIVITY TEST: MOR KO MICE: MP1208: 100 nmol I.c.v. in 50% DMSO
Mouse:	Wt (g):	Pre-T/F (sec):		10 min	%A-10 min	20 min	%A-20 min	30 min	%A-30 min	40 min	%A-40 min	50 min	%A-50 min	60 min	%A-60 min	70 min	%A-70 min	80 min	%A-80 min	90 min	%A-90 min	100 min	%A-100 min	110 min	%A-110 min
1	N/R	1.3		2.9	11.68	3.4	15.33	1.7	2.92	2.2	6.57	1.7	2.92	1.3	0	1.3	0	1.3	0
2		1.4		2.7	9.56	1.5	0.74	2	4.41	2.5	8.09	1.2	0	1.2	0	1.4	0	1.1	0
3		1.2		12	78.26	13.9	92.03	13.5	89.13	4.1	21.01	3.5	16.67	1.5	2.17	1.3	0.72	1.9	5.07
4		1.2		2.7	10.87	2.2	7.25	2.9	12.32	1.6	2.9	1.4	1.45	1.7	3.62	1.3	0.72	1.3	0.72
5		1.4		3.8	17.65	1.8	2.94	1.6	1.47	1.6	1.47	1.7	2.21	1.3	0	1.8	2.94	1.2	0
6		1.1		3.4	16.55	1.6	3.6	2.8	12.23	2.3	8.63	1.4	2.16	1.4	2.16	1.2	0.72	1.1	0
7		1.4		2.8	10.29	2.1	5.15	1.8	2.94	1.6	1.47	2.7	9.56	1.4	0	1.2	0	1.2	0
8		1.2		3.3	15.22	2.5	9.42	2.4	8.7	2.3	7.97	1.7	3.62	1.7	3.62	1.3	0.72	1.2	0
		1.275		4.2	21.26	3.625	17.0575	3.5875	16.765	2.275	7.26375	1.9125	4.82375	1.4375	1.44625	1.35	0.7275	1.2875	0.72375
		0.0411877		1.12282	8.21329	1.48321	10.8289	1.42671	10.4467	0.291394	2.23074	0.277384	1.96586	0.0652947	0.580181	0.0681385	0.340251	0.0914906	0.62725
		8		8	8	8	8	8	8	8	8	8	8	8	8	8	8	8	8
		t-test to pre T/F:		0.0366028		0.159908		0.127492		0.0043301		0.0392846		0.0538401		0.362175		0.902624
			t-test to WT MP1208 (100 nmol):		0.000318309		0.000136467		0.000296144		0.00221179		0.00248822		9.96303e-05		0.00229296		0.290098
KOR AGONIST SELECTIVITY TEST: KOR KO MICE: MP1208: 100 nmol I.c.v. in 50% DMSO
Mouse:	Wt (g):	Pre-T/F (sec):		10 min	%A-10 min	20 min	%A-20 min	30 min	%A-30 min	40 min	%A-40 min	50 min	%A-50 min	60 min	%A-60 min	70 min	%A-70 min	80 min	%A-80 min	90 min	%A-90 min	100 min	%A-100 min	110 min	%A-110 min
1	N/R	1.2		10.5	67.39	5.7	32.61	5.6	31.88	3.9	19.57	3.7	18.12	2.5	9.42	2	5.8	2	5.8	1.5	2.17	1.2	0	1.4	1.45
2		1.4		13.9	91.91	15	100	7.4	44.12	7.9	47.79	7.5	44.85	5.5	30.15	4.1	19.85	2.4	7.35	1.5	0.74	1.5	0.74	1.4	0
3		1.4		3.1	12.5	3	11.76	3.5	15.44	2.3	6.62	3.7	16.91	4.3	21.32	3.8	17.65	2.8	10.29	2.9	11.03	1.5	0.74	1.8	2.94
4		1.8		15	100	15	100	15	100	15	100	10.4	65.15	9.1	55.3	4.8	22.73	2.1	2.27	1.7	0	1.4	0	1.6	0
5		1.7		4.8	23.31	9.4	57.89	4.3	19.55	3.6	14.29	4.4	20.3	2.7	7.52	1.9	1.5	3.5	13.53	1.4	0	1.3	0	1.3	0
6		1.1		15	100	15	100	5.5	31.65	4	20.86	3.4	16.55	3.9	20.14	DIED		DIED		DIED		DIED		DIED
7		2		4.1	16.15	1.8	0	2.8	6.15	2.4	3.08	5	23.08	3.9	14.62	3.3	10	3	7.69	3	7.69	4.3	17.69	2.9	6.92
8		1.5		15	100	15	100	2.8	9.63	13.9	91.85	14.6	97.04	13.6	89.63	3.7	16.3	4.9	25.19	6	33.33	7	40.74	4	18.52
		1.5125		10.175	63.9075	9.9875	62.7825	5.8625	32.3025	6.625	38.0075	6.5875	37.75	5.6875	31.0125	3.37143	13.4043	2.95714	10.3029	2.57143	7.85143	2.6	8.55857	2.05714	4.26143
		0.107633		1.88829	14.19	2.04891	15.2478	1.4195	10.6638	1.81617	13.5221	1.42496	10.4414	1.34754	9.93339	0.405741	2.95221	0.37976	2.81319	0.626295	4.53932	0.841767	5.89801	0.384124	2.55653
		8		8	8	8	8	8	8	8	8	8	8	8	8	7	7	7	7	7	7	7	7	7	7
		t-test to pre T/F:		0.00285402		0.00471804		0.00855268		0.0139024		0.00319214		0.00801498		0.000408478		0.00187362		0.0979769		0.192704		0.170709
			t-test to WT MP1208 (100 nmol):		0.404809		0.137769		0.00278493		0.521451		0.477764		0.553208		0.0423083		0.00973614		0.107715		0.229318		#DIV/0!
DOR AGONIST SELECTIVITY TEST: DOR KO MICE:MP1208: 100 nmol I.c.v. in 50% DMSO
Mouse:	Wt (g):	Pre-T/F (sec):		10 min	%A-10 min	20 min	%A-20 min	30 min	%A-30 min	40 min	%A-40 min	50 min	%A-50 min	60 min	%A-60 min	70 min	%A-70 min	80 min	%A-80 min	90 min	%A-90 min	100 min	%A-100 min	110 min	%A-110 min
1	N/R	1.4		15	100	15	100	15	100	15	100	2.5	8.09	6	33.82	3.1	12.5	4	19.12	1.7	2.21	1.3	0	1.4	0
2		1.5		15	100	15	100	15	100	15	100	15	100	10.1	63.7	3.6	15.56	2.9	10.37	1.3	0	2	3.7	1.9	2.96
3		1.5		4.1	19.26	15	100	15	100	15	100	15	100	5.4	28.89	3.3	13.33	2.2	5.19	1.4	0	1.4	0	1.3	0
4		1.2		15	100	15	100	15	100	14.7	97.83	15	100	12.4	81.16	2.5	9.42	1.5	2.17	1.6	2.9	1.3	0.72	1.6	2.9
5		1.7		15	100	15	100	15	100	15	100	6.1	33.08	3.1	10.53	3	9.77	1.7	0	1.5	0	1.5	0	1.3	0
6		1.7		14.9	99.25	15	100	15	100	15	100	8	47.37	5.9	31.58	3.1	10.53	1.5	0	1.6	0	1.5	0	1.5	0
7		2.4		3.8	11.11	2.2	0	8	44.44	15	100	11.1	69.05	15	100	15	100	8.4	47.62	3	4.76	1.5	0	2.2	0
8		2.2		5.2	23.44	2.3	0.78	15	100	12.1	77.34	5.1	22.66	2.3	0.78	2.3	0.78	2.6	3.13	3.7	11.72	3	6.25	1.3	0
		1.7		11	69.1325	11.8125	75.0975	14.125	93.055	14.6	96.8962	9.725	60.0313	7.525	43.8075	4.4875	21.4863	3.1	10.95	1.975	2.69875	1.6875	1.33375	1.5625	0.7325
		0.143925		1.94707	15.0356	2.08673	16.3027	0.875	6.945	0.359066	2.80662	1.76815	13.2658	1.59595	12.2322	1.50895	11.322	0.813722	5.70557	0.310386	1.4333	0.203046	0.834949	0.116401	0.479567
		8		8	8	8	8	8	8	8	8	8	8	8	8	8	8	8	8	8	8	8	8	8	8
		t-test to pre T/F:		0.00265523		0.0026106		1.24963e-09		9.67167e-15		0.000477077		0.00270348		0.0872244		0.112348		0.434957		0.960653		0.469868
			t-test to WT MP1208 (100 nmol):		0.60897		0.415298		0.420755		0.000990726		0.0518633		0.157103		0.204353		0.139094		0.15974		0.865862		#DIV/0!

## Sheet: CLAMS (2)
C57BL/6J mice: CLAMS testing, MP1207 and MP1208 as listed.
Locomotor database (from CLAMS system): takes 30 sec samples and averages them together in 5 min "bins." Note that all animals (C57Bl/6J mice) habituated first with 25-min exposure to box without treatment.
Note that C57Bl/6 mice reported on Jackson website to average ? Locomotor activity. Comparison difficult.
This data represents only the average number of "locomotor beam breaks," or "XAMB COUNTS." This reflects a beam break, followed by the break of an adjacent beam immediately thereafter. As such, should exclude sitting in front of beam or stereotypy of focalized type (i.e., barrel rolling; seizures).
												LOCOMOTOR ACTIVITY-Figure 6D-F
Saline effects, ICV: (in 0.9% Saline, 5ul i.c.v.) administered 5 min prior to placement in box.
	Box:	Mouse		Average locomotion (XAMB) - Total for time period																																									With 150-min cut off:			With 90-min cut off:
			Start - 05:00	5:00 - 10:00	10:00 - 15:00	15:00 - 20:00	20:00 - 25:00	25:00 - 30:00	30:00 - 35:00	35:00 - 40:00	40:00 - 45:00	45:00 - 50:00	50:00 - 55:00	55:00 - 60:00	60:00 - 65:00	65:00 - 70:00	70:00 - 75:00	75:00 - 80:00	80:00 - 85:00	85:00 - 90:00	90:00 - 95:00	95:00 - 100:00	100:00 - 105:00	105:00 - 110:00	110:00 - 115:00	115:00 - 120:00	120:00 - 125:00	125:00 - 130:00	130:00 - 135:00	135:00 - 140:00	140:00 - 145:00	145:00 - 150:00	150:00 - 155:00	155:00 - 160:00	160:00 - 165:00	165:00 - 170:00	170:00 - 175:00	175:00 - 180:00	180:00 - 185:00	185:00 - 190:00	190:00 - 195:00	Total XAMB:	Average XAMB per 5 min:		Total XAMB:	Average XAMB per 5 min:		Total XAMB:	Average XAMB per 5 min:
		1	20.1	7	1	1.3	6.1	3.9	0.5	9.3	8	2	0.6	1	0.2	0	0.1	0.1	0.2	0.3	0.1	0.1	0	0.2	0	0	0.2	0.4	13.5	3.4	10.4	6.9	1.1	3.5	0	0.1	0.1	3.1				104.8	2.91		96.9	3.23		61.7	3.43
		2	2.2	8.4	0.9	9.5	8.4	1.7	0.1	0	0	6.2	8	7.7	1.7	1.1	0	0	0.3	0.7	0	0.5	0	0	0	0	0.2	0	0	0	0	0	0.5	7.9	19.4	16.1	18.1	6.6				126.2	3.51		57.6	1.92		56.9	3.16
		3	23.5	7.8	10.2	1.4	7.5	15.2	0.3	7.6	36.7	12	3.8	40	13.9	2.7	0.2	27.2	13.4	0.3	29.2	23.6	4	8.2	29.9	9.4	0.2	13.9	1.7	0.4	0	0	0	0	0	0	0.1	7.8				352.1	9.78		344.2	11.47		223.7	12.43
		4	6.2	3.5	18	23.5	10.2	34.8	4.4	10.1	25.8	8.2	14.7	4.2	12.3	25.1	5.4	4.2	2	2.3	1.9	5.9	4.9	20.9	15.1	11.5	14.1	5.9	17.6	12.4	8.4	4.6	7.1	8.6	7.5	8.7	0.5	11.8				382.3	10.62		338.1	11.27		214.9	11.94
		5	9.7	7.3	23.2	5.6	1	15.6	13.3	4.5	28.2	1.9	10.1	0.5	0.8	6.5	23.4	0.8	9.6	27	13.1	9.2	20.7	0.1	0.2	0.2	0	0.1	0.3	0	0	0.1	0.4	7.6	20.6	30.3	27	4.4				323.3	10.78		233	7.77		189	10.5
		6	24.7	15.9	9.8	15.9	1.2	7.4	21.4	4.1	15.8	4.5	10.2	0.5	2.6	10	1.5	6.6	6.1	0.1	0.1	1	0.1	0	0.2	0.4	0.1	0	0	0	0	0	0.2	0	0	0.1	16.6	6.4				183.5	6.12		160.2	5.34		158.3	8.79
		7	5.1	4.4	29.7	5.2	10.8	29.9	2.2	1.9	0	0	0	3.5	0	0	0.6	21.1	8.3	3.3	4.9	0	0	0	0	0	0	0	0	0	0.1	0	0	0	5.1	17.2	5.2	3.5				162	5.4		131	4.37		126	7
		8	4.6	3.5	9.7	14.3	0.6	1.5	0.4	14.8	9.9	0	0.4	0.1	0	0	0	0	0	0	0	0	0	0	3.3	20.5	6	1.8	3.4	2.2	0.2	0.1	0.1	0	0.5	0.5	1.1					99.5	3.32		97.3	3.24		59.8	3.32
		9	8.5	4.2	5.8	9.9	0.1	0	0	13.4	4	5.1	0	0.3	0.1	0	0.6	0.4	0.1	0	0	1.9	0.4	0.5	0.3	0.1	0.2	0	0.7	1.1	0.2	0	0.2	0.6	0	0	0.2					58.9	1.96		57.9	1.93		52.5	2.92
		10	7.5	10.3	12.1	4.8	8.7	37.5	3.1	0.1	1.4	0	0.2	6.9	5.7	0.5	0.1	0.7	16.7	12.3	3	1.3	0.5	0.2	0	0.3	0	0	0.1	0	0	0.1	0	0	1.1	0	0					135.2	4.51		134.1	4.47		128.6	7.14
		11	12.3	1	9.8	8.2	8.3	0.5	0.1	9	10.2	0.3	0.5	0	0	0	0	0.7	0.2	0	0	0.5	0.1	0.5	5.4	13.8	29.5	28.2	8.6	2.7	2.8	1.6	0.5	0.4	0	0.3	0.4					156.4	5.21		154.8	5.16		61.1	3.39
	113	12	18.1	13.9	6.8	10.2	8	11.1	14	10.6	9.3	8.5	7.8	3.9	2.8	6.3	11.9	16.3	11.2	9.6	17.6	10.4	10.7	5.5	1.1	4.8	2.7	0.2	5.4	14.8	1	1.7	2.6	0.8	0.5	1.9	0.3	0.3	0.8	1.8	0.5	265.7	8.86		256.2	8.54		180.3	10.02
	114	13	43.2	10.1	12.7	11.5	3.1	42.9	11.8	5.9	4.7	0.2	14	5.2	0.1	0.2	2.1	0.3	1	0.3	0	0.4	6	14.2	15.2	6.6	15.3	2.3	0	0.2	0.2	0.6	2.2	0.1	0.6	0	1.4	0	0.3	0.4	3.1	238.4	7.95		230.3	7.68		169.3	9.41
	115	14	24.2	13.5	16	7.4	11.3	14.4	18.1	6	5.1	3	8	11.5	0.8	0.7	2.8	0.2	1.1	0	0	0	8.9	4	0.2	0.1	0.1	0	0.1	0	0.1	0.1	0.1	0.1	2.9	1.2	0.4	0.1	0.3	0	0	162.8	5.43		157.7	5.26		144.1	8.01
	116	15	32.4	25.5	16.8	7.4	18.6	5.2	15.1	5.1	11.3	0.2	0.6	4.6	0.3	1.3	1.3	0.1	0	0.2	0.3	0	0	10.3	25.1	39.4	7.6	11.1	5.4	8.6	6.4	0	0	0.2	0.1	0	0.1	18.3	7.9	0	0.1	286.9	9.56		260.2	8.67		146	8.11
		Average:	16.15	9.09	12.17	9.07	6.93	14.77	6.99	6.83	11.36	3.47	5.26	5.99	2.75	3.63	3.33	5.25	4.68	3.76	4.68	3.65	3.75	4.31	6.4	7.14	5.08	4.26	3.79	3.05	1.99	1.05	1	1.99	3.89	5.09	4.77	5.66				202.53	6.39		180.63	6.02		131.48	7.3
		SEM:	3.04	1.61	2	1.48	1.31	3.77	1.99	1.15	2.82	0.99	1.39	2.58	1.16	1.73	1.65	2.29	1.48	1.92	2.23	1.68	1.52	1.66	2.59	2.83	2.2	2.05	1.42	1.26	0.9	0.53	0.48	0.84	1.78	2.36	2.21	1.67				25.68	0.77		23.82	0.79		15.5	0.86
50%DMSO effects, ICV: LOCOMOTION (in 50% DMSO/50% Saline (0.9%), 5ul i.c.v.) administered 5 min prior to placement in box.
	Box:	Mouse		Average locomotion (XAMB) - Total for time period																																									With 150-min cut off:			With 90-min cut off:
			Start - 05:00	5:00 - 10:00	10:00 - 15:00	15:00 - 20:00	20:00 - 25:00	25:00 - 30:00	30:00 - 35:00	35:00 - 40:00	40:00 - 45:00	45:00 - 50:00	50:00 - 55:00	55:00 - 60:00	60:00 - 65:00	65:00 - 70:00	70:00 - 75:00	75:00 - 80:00	80:00 - 85:00	85:00 - 90:00	90:00 - 95:00	95:00 - 100:00	100:00 - 105:00	105:00 - 110:00	110:00 - 115:00	115:00 - 120:00	120:00 - 125:00	125:00 - 130:00	130:00 - 135:00	135:00 - 140:00	140:00 - 145:00	145:00 - 150:00	150:00 - 155:00	155:00 - 160:00	160:00 - 165:00	165:00 - 170:00	170:00 - 175:00	175:00 - 180:00	180:00 - 185:00	185:00 - 190:00	190:00 - 195:00	Total XAMB:	Average XAMB per 5 min:		Total XAMB:	Average XAMB per 5 min:		Total XAMB:	Average XAMB per 5 min:
	117	1	10	14.7	13.1	13.6	12	20.4	10.1	13.9	19.5	6.4	8.6	21.3	29.4	1.5	1.5	12.1	0	0	2.8	2.6	8	4.2	0	0.7	2.3	0.1	0.2	0	0.2	0	0									229.2	6.37		229.2	7.64		208.1	11.56
	118	2	1.4	4.5	7.8	13.2	0.5	0.4	0.3	0.2	0	4.1	0	0	0.2	0	0.2	0.4	0.4	0.1	0.4	0	0.1	0	0.3	0.3	0.3	0.6	0.1	3.6	9.9	21.9	1.7									72.9	2.03		71.2	2.37		33.7	1.87
	119	3	1.2	4.5	0.4	9.3	0.4	0.6	8.5	1.4	0	0	0.1	3.9	0.2	0.1	0.2	0.1	0	0	0.1	0.1	0	1.2	5.9	13	7.9	1.4	0	0	0.3	0	0.4									61.2	1.7		60.8	2.03		30.9	1.72
	120	4	0.1	0	0.9	11.2	6.1	0	0	0.1	0.1	0.4	0.1	0.1	0.1	0.8	5.1	5	1.6	0	0	0	5.1	0	0	0.1	0.1	0.1	0	0.1	0	0.1	0									37.3	1.04		37.3	1.24		31.7	1.76
	129	5	0.1	0.6	0.3	0.4	0	2.4	0.1	0	0.7	0.3	0.5	0.8	0.8	0	0	0	0	0.4	5.6	10	20.2	7.2	0	0	0	0	0.5	0.2	0.3	0	0									51.4	1.43		51.4	1.71		7.4	0.41
	130	6	2.9	5.7	13.2	9.3	9.7	5.9	0	0	0.2	0.1	0.3	1.3	12.6	8.1	0.5	0.2	0	0	0.3	0	0	0.2	0	0.5	0	0.2	0.4	0	6.9	1.3	0.2									80	2.67		79.8	2.66		70	3.89
	131	7	3.9	0.4	0.1	0.5	3	2.7	12.7	9.9	1.2	0	0.2	0.1	0	0	0.2	0	1.5	14.1	2.6	0	0	0	0	0	0.1	0.4	0	0	0	0	0									53.6	1.79		53.6	1.79		50.5	2.81
	132	8	0.8	0.1	0.1	1.3	1.3	9.6	0	0	0	0.1	1.4	0	0	0.2	0.1	0.3	2.9	9.6	0	0	0	0.1	0	0	0	0	0	3.6	15.8	0	0									47.3	1.58		47.3	1.58		27.8	1.54
	109	1	0.2	7.3	9.2	2.4	0.2	2.3	5	0	0	0	1.6	2.2	10.3	4.5	3.5	0.1	0	0	0	0	0	0	0.1	0	0	0	0	0	0	0	0	0	0	0	0.1	6.1	4.8	9.5	8.3	77.7	2.59		48.9	1.63		48.8	2.71
	110	2	12	5.8	1.3	0.6	0.4	0.1	12.1	3.5	0.8	0.6	0.3	0.1	0.3	0	0	0.5	15.7	15.4	4.9	0.7	1.1	1.2	0	0	0	0	0.1	0	0.1	0.2	0.3	0.1	0	0.1	0.1	0.2	0.1	0.3	0.2	79.2	2.64		77.8	2.59		69.5	3.86
	111	3	2.5	14.3	10.8	0.8	5.7	1	0.2	0	0	1.9	0	0.2	0	0	0	0	0	7	1.6	0.5	1.8	1.3	0	0.1	0.1	0.1	0	0.1	0	0	0	0	0	0	0	0	0	0	1	51	1.7		50	1.67		44.4	2.47
	112	4	6.8	13.5	28.8	2.7	3.3	1.9	0.2	0	4.5	15	1.5	3.1	4.5	0	0.1	0.3	0.5	0.2	0.2	0.4	0	0	0	0.2	0.7	0.3	0	0	0	0	0	0	0	0	0	1.6	0	0.3	0	90.6	3.02		88.7	2.96		86.9	4.83
	113	5	5.6	5.2	7.9	6.7	0.3	4	0.2	0.3	0.6	0.5	0.4	0	0.1	0.2	0.1	0.2	0.4	0	0.5	0	0	0	0	0	0	0	0.1	0	0.1	0	8.8	17.7	16	3.6	9	8.1	2.1	0.6	0.2	99.5	3.32		33.4	1.11		32.7	1.82
	114	6	2.5	3.5	3.3	2.3	4.8	2.9	1.7	0.4	3.3	3.6	0	0	0	0	3.1	0	0	0	0	0	0	0	0	6.3	0.1	0	0	0	0	0.1	0	0	0	0	0	0	0	0	0	37.9	1.26		37.9	1.26		31.4	1.74
	115	7	17.9	9.2	19	2.1	0.3	22.5	25	1.3	0	1.2	0	0	0	0	0	0.1	0	0	0	0	0	0	0.1	0.1	0.5	0.1	0	0	0.2	2.4	0	0	0.6	1.3	8.2	21.3	33.9	27	2.8	197.1	6.57		102	3.4		98.6	5.48
	116	8	10.3	0.7	9	11.4	9.5	3	0.2	0.3	0.1	0.1	0.4	0	15.7	8.2	19.2	0.1	0	0	0.9	0	0	0.2	0.7	0.1	0.4	0	1.1	0	0	0	0	2.8	9.4	5	4.4	0	0.2	0.4	0.1	113.9	3.8		91.6	3.05		88.2	4.9
	113	17	28.8	2.7	11.3	0.2	5.6	9.8	3.8	0	0.1	0.1	1	16.3	3	0.3	0.4	0	0	0.4	0	0	0.1	0.8	0.1	0.3	2.4	4.8	1.1	5.9	0	0	0.1	0	0.7	0	0	0	0	0.2	0	100.3	3.34		99.3	3.31		83.8	4.66
	114	18	1.3	0.5	0	9	8.8	2.8	0	1	5.8	0	0.5	10.4	15.7	0.9	0.8	0	0	0	0.6	0	0	0	0	0	0	0	0	1.9	14.9	19.8	1.3	0.3	0	0	0.3	0	0	0	0	96.6	3.22		94.7	3.16		57.5	3.19
	115	19	25.4	2.9	1.5	10	3.1	6.7	0.1	0.3	0	0.1	11.5	5.5	0	0	0	0	0	0	0.7	0	0.3	0	0	0	0.7	12.8	12.5	8.4	5.9	0	0	0	0	0	0.3	0.1	0	0.3	0	109.1	3.64		108.4	3.61		67.1	3.73
	116	20	33.9	5.5	3.8	14.7	2.8	0	0	4.5	14.6	4.2	0	0	0.2	0	0.1	0.5	4.9	0	0	0	0	0	0.1	0.3	0.2	0.3	0.6	0	0	0.2	0.1	0.1	0	0.1	11.2	8.4	8.9	3.3	0.9	124.4	4.15		91.4	3.05		89.7	4.98
	125	21	36	8.4	19.4	3.8	3.5	0.8	0.2	10.1	1.6	0.2	0	0	0	0	1.6	20.1	0	3.6	2	0.3	0	0	0	0	0.1	0	0	0	0.1	0	0	0	0	2.8	9.6	30.5	27.8	12.3	4.6	199.4	6.65		111.8	3.73		109.3	6.07
	126	22	46.4	24.1	6	11	10.7	8.4	9	0.1	1.9	8	18.1	0.1	1.4	3.7	0.2	0	0.5	0.5	0	0.1	0.2	0	0	0	0	3.6	0.3	0.4	0	0.5	0	0	0	0	0	0.8	0	2.8	17.7	176.5	5.88		155.2	5.17		150.1	8.34
	127	23	10.3	7.8	0.6	1	0	2	3.3	15.1	1.3	0	0.5	0.3	0	2	8.7	9.1	0	0.1	0.5	0.1	0.7	1.8	0	0	0	0	0	0	0	0.1	0.1	0	0	0.1	0.1	0	0	0	0	65.6	2.19		65.3	2.18		62.1	3.45
	128	24	34.4	39.1	14.4	16.6	10.9	7.2	10.3	2.9	0.4	1.2	17.9	6.9	0.7	0	0	0	3.2	7.7	6.3	0.2	0.2	0.1	0	0.1	0	0	0.2	0.3	0	0.2	0.3	0	0.1	0	0.1	2.2	17.7	4.9	14.6	221.3	7.38		181.4	6.05		173.8	9.66
		Average:	12.28	7.54	7.59	6.42	4.29	4.89	4.29	2.72	2.36	2	2.7	3.03	3.97	1.27	1.9	2.05	1.32	2.46	1.25	0.63	1.58	0.76	0.3	0.92	0.66	1.03	0.72	1.02	2.28	1.95	0.55	1.31	1.68	0.81	2.71	4.96	5.97	3.87	3.15	103.04	3.33		86.18	2.87		73.08	4.06
		SEM:	2.87	1.81	1.56	1.11	0.82	1.21	1.28	0.94	0.98	0.72	1.12	1.14	1.52	0.5	0.86	1.01	0.68	0.96	0.38	0.42	0.9	0.34	0.25	0.59	0.34	0.57	0.52	0.45	0.98	1.19	0.37	1.11	1.12	0.39	1.06	2.21	2.72	1.8	1.4	12	0.39		9.65	0.32		9.91	0.55
Morphine (30 nmol) effects, ICV: AMBULATION (in saline (0.9%), 5ul i.c.v.) administered 5 min prior to placement in box.
	Box:	Mouse		Average locomotion (XAMB) - Total for time period																																									With 150-min cut off:			With 90-min cut off:
			Start - 05:00	5:00 - 10:00	10:00 - 15:00	15:00 - 20:00	20:00 - 25:00	25:00 - 30:00	30:00 - 35:00	35:00 - 40:00	40:00 - 45:00	45:00 - 50:00	50:00 - 55:00	55:00 - 60:00	60:00 - 65:00	65:00 - 70:00	70:00 - 75:00	75:00 - 80:00	80:00 - 85:00	85:00 - 90:00	90:00 - 95:00	95:00 - 100:00	100:00 - 105:00	105:00 - 110:00	110:00 - 115:00	115:00 - 120:00	120:00 - 125:00	125:00 - 130:00	130:00 - 135:00	135:00 - 140:00	140:00 - 145:00	145:00 - 150:00	150:00 - 155:00	155:00 - 160:00	160:00 - 165:00	165:00 - 170:00	170:00 - 175:00	175:00 - 180:00	180:00 - 185:00	185:00 - 190:00	190:00 - 195:00	Total XAMB:	Average XAMB per 5 min:		Total XAMB:	Average XAMB per 5 min:		Total XAMB:	Average XAMB per 5 min:
	113	1	0.2	0.8	4.8	5.2	5.4	7.9	3	2.5	0	0.7	25.8	2.6	5.8	0.7	2.9	0	0	0.4	11.4	2	3.4	0.3	0.1	0.2	0	5.8	0.1	0.1	0.1	0.4	0	1.5	0.1	0	3.5	2.7	0.1	0	0.4	100.9	2.8		92.6	3.09		68.7	3.82
	114	2	7.9	8.5	14.6	2	3.4	6.3	3.9	8.2	38.1	4.2	11	2.5	0.7	0.6	2	1.8	0.4	17.1	7.9	0	7.5	4	10.5	0	0.1	0.1	0	0	0	2	0	0	0.2	1.5	0.1	0	0.6	0.1	0	167.8	4.66		165.3	5.51		133.2	7.4
	115	3	13.5	17	10.3	16.8	18.1	35.6	11.8	11.4	3.4	10.1	2	8.9	32.7	2	0	4	49.5	24.4	1.1	0.8	0	12.2	11.9	1.1	1	0	0	1.1	0.5	0.2	1.1	0	1	7	39.5	14.2	3.7	2.2	11.8	381.9	10.61		301.4	10.05		271.5	15.08
	116	4	10.7	7.8	4.4	11	7.1	7.3	11.1	37.3	11.4	12.3	2.6	12.4	12.6	2.4	14.8	8.5	7.1	5.5	9	6.9	2.8	0	0	9.4	0.4	0.2	1.2	0.2	1.2	37.2	33.4	16.2	10	9.1	0	0	0	0.1	0	323.6	8.99		254.8	8.49		186.3	10.35
	117	5	4.8	0	0.2	7.9	6.3	1	2.1	6.3	0.4	1.6	8	0.5	0.4	2.5	19.2	0.8	1.6	1.9	1	4	2.5	0.1	0	0.8	0.2	0.2	0.6	0	0	0.1	0	0	0	1.3	4.5	8.3	0	0.1	0.1	89.3	2.48		75	2.5		65.5	3.64
	118	6	12.7	9.9	8.1	10.6	14.2	5.7	1.3	7.4	6.1	2.8	6.1	1.7	0.9	12.5	0.5	2.9	0	4.8	0.8	0.3	6.2	0	0.2	0	0	4.2	1.6	0	0	0	0	0.7	0	0	0	0	0.2	0.1	0.8	123.3	4.11		121.5	4.05		108.2	6.01
	119	7	15.7	1.1	6	11	10.4	7.5	6.4	0.8	5.1	16	11	5.5	4.2	10.2	2.2	4.2	3	2.7	1.3	14.1	0.6	1.9	0.5	2.7	0	2.1	1.4	0	0	0	0.6	0	0	0.1	0	0	0	0	0	148.3	4.94		147.6	4.92		123	6.83
	120	8	14.7	0	14.5	3.6	7	7.3	6.3	2.8	8.4	0.1	10.8	4	0	5	2.7	4	6.7	2.1	2.6	14.1	30.1	9.6	0	10.8	31.4	26.1	3.5	3.6	11.8	13.8	0	0	0	0	0	0.3	0	0.1	0.2	258	8.6		257.4	8.58		100	5.56
	102	9	1.2	2.4	44.6	67.3	95.5	130.6	134.6	147.6	158.4	150.4	171.4	189.9	167.8	195.4	187.2	214.2	285.4	218.2	237.2	241	202.9	262.3	232.2	268.8	264.3	250.8	220.7	222.5	221.9	251.9	263.4	269.9	341.1	280	266.6	286	87.1	303.2	192.6	7728.5	257.62		5438.6	181.29		2562.1	142.34
	103	10	1.8	10.6	16.3	33.6	17.7	16.1	7	4.7	32.7	16.3	33.3	12.4	6.1	5.9	0	7.5	23.4	3.7	0.2	1.2	0	0.4	0.1	0	0	5.4	10.9	0.2	0.5	0.1	0.2	0	0	0	0.1	0.2	0.7	5.1	12.9	287.3	9.58		268.1	8.94		249.1	13.84
	104	11	18.8	26	20.7	15	14.5	9.5	16	9.6	14.6	7.5	11.5	19.4	24	15.1	17.1	29.7	16.6	12.4	10.2	9.6	4.8	9.6	2.7	10.9	6.7	3.8	0	14.9	25	19.4	12.9	7.3	6.9	1.7	3	3.4	1	0.1	3.8	455.7	15.19		415.6	13.85		298	16.56
	105	12	30	39.2	57.7	72.7	54.1	83.6	50.6	61.8	33.9	41.2	50.4	76.9	63.2	65.5	28.4	46.4	29.4	31	31.8	26.1	30.6	40.8	23.8	10.5	13.6	35	42.1	39.2	18.4	28.4	9.4	35.1	45.5	7.3	19.7	12.5	6.5	0.4	2.3	1395	46.5		1256.3	41.88		916	50.89
	107	13	3.3	18.5	15.1	8.5	43.8	13.7	9.8	8.4	3.3	4.4	0.2	19.1	36.8	30.7	27.9	15.5	16.8	2.8	1.9	21.1	1.9	1.1	0.4	2.8	0	0.3	0.2	0.4	0.3	0.2	2.1	0.6	0	0	0	0	0	0.2	15.7	327.8	10.93		309.2	10.31		278.6	15.48
	108	14	0.1	0.4	12.3	38.8	41.1	84.2	114.7	133.6	156.9	174.4	199.8	204.8	214.7	200.2	196.4	234.9	202.9	232.7	226.2	268.3	252.2	237.1	227.7	253.4	247.9	253.2	238.4	250.4	259.2	263.2	262.6	269.8	280	293	273.4	319.5	286.9	256.7	281	7943	264.77		5420.1	180.67		2442.9	135.72
	105	15	29.7	22	39.5	49	99.3	115.2	162.2	158.1	177.4	220.1	235.1	253.7	232.4	224.5	231.2	252.7	269.6	245.8	242.1	221.2	210.6	207.7	268.2	309.9	314.4	257.5	318.2	320.1	341.1	307.1	280.8	354.6	331.8	348.8	398.5	357.8	306.2	399.1	331.3	9444.5	314.82		6335.6	211.19		3017.5	167.64
	106	16	47.6	51.7	54.9	56.1	71.5	82.7	105.5	114.9	143.4	182.5	230.1	220	311.4	336.8	356.1	380.3	388.6	337.3	346.4	317.5	359.1	354.2	332.7	299.5	275.6	236.3	200	180.2	138.1	160.7	140.5	122.9	92.8	118.9	167.2	51.6	61.9	62.4	45.5	7535.4	251.18		6671.7	222.39		3471.4	192.86
	107	17	6.1	10	12.1	34.6	95	159.7	187.7	193.9	243.3	218.7	205.3	311.6	273	259.4	268.9	255.1	247.2	198.8	233.4	272.3	264.9	239.9	273.9	269.6	240.4	272.2	258.4	177.5	215.9	222.5	211.1	269.4	254.4	261.4	250.4	238	236.8	253	179.3	8275.1	275.84		6121.3	204.04		3180.4	176.69
	108	18	1.1	14.9	43.3	19.7	6.6	3.5	1.1	5.9	0.7	0.2	1.3	0	0.1	0	0.4	0.1	0	0	0.4	3.7	6	2.5	0.3	0.2	0	0.3	0.7	1.5	0	0.7	0.2	0.6	0.2	1.8	0.2	0.1	1.3	0.1	0.3	120	4		115.2	3.84		98.9	5.49
		Average:	12.22	13.38	21.08	25.74	33.94	43.19	46.39	50.84	57.64	59.08	67.54	74.77	77.04	76.08	75.44	81.26	86.01	74.53	75.83	79.12	77.01	76.87	76.96	80.59	77.56	75.19	72.11	67.33	68.56	72.66	67.68	74.92	75.78	73.99	79.26	71.92	55.17	71.28	59.89	2505.86	83.2		1875.96	62.53		976.18	54.23
		SEM:	3.01	3.36	4.3	5.33	8.14	12.17	14.97	15.62	18.55	20	21.58	25.2	25.58	26.26	27.19	29.11	30.18	26.66	27.91	28.18	28.21	28.4	29.02	30.16	28.97	27.02	26.93	25.49	26.5	26.2	25.59	29.13	30.09	29.71	30.47	30.17	24.84	30.97	25.31	861.31	28.76		626.13	20.87		301.95	16.78
Morphine (100 nmol) effects, ICV: AMBULATION (in saline (0.9%), 5ul i.c.v.) administered 5 min prior to placement in box.
Date:	Box:	Mouse		Average locomotion (XAMB) - Total for time period																																									With 150-min cut off:			With 90-min cut off:
			Start - 05:00	5:00 - 10:00	10:00 - 15:00	15:00 - 20:00	20:00 - 25:00	25:00 - 30:00	30:00 - 35:00	35:00 - 40:00	40:00 - 45:00	45:00 - 50:00	50:00 - 55:00	55:00 - 60:00	60:00 - 65:00	65:00 - 70:00	70:00 - 75:00	75:00 - 80:00	80:00 - 85:00	85:00 - 90:00	90:00 - 95:00	95:00 - 100:00	100:00 - 105:00	105:00 - 110:00	110:00 - 115:00	115:00 - 120:00	120:00 - 125:00	125:00 - 130:00	130:00 - 135:00	135:00 - 140:00	140:00 - 145:00	145:00 - 150:00	150:00 - 155:00	155:00 - 160:00	160:00 - 165:00	165:00 - 170:00	170:00 - 175:00	175:00 - 180:00	180:00 - 185:00	185:00 - 190:00	190:00 - 195:00	Total XAMB:	Average XAMB per 5 min:		Total XAMB:	Average XAMB per 5 min:		Total XAMB:	Average XAMB per 5 min:
	101	1	2.1	79	44	32.4	19.8	24.3	26.3	11.6	14.3	20.1	18.7	8.6	10	21	84.1	13.4	16.4	2.9	5.7	26.9	9.2	8.1	7.1	1.2	2.4	15.3	23.1	0.9	0	12.5	0.9	0.5	3.3	6.7	2.5	0.7	0.2	0.2	0	576.4	16.01		561.4	18.71		449	24.94
	102	2	4.8	2.6	15.5	10.9	9.7	9.9	7.5	2	10.3	2.5	2.2	3.3	6	2.8	7.8	1.4	0.6	16	1.4	8.3	0	7.7	0.4	1.2	0.2	9	19.5	9.7	0.7	5.4	7.3	0	0	4.2	0	0.1	0.4	0.3	1.1	192.7	5.35		179.3	5.98		115.8	6.43
	103	3	15.6	51.2	40.3	38.4	27.3	30.2	39.9	37.7	33	37.9	35.5	47.3	38	41.5	31.8	53.5	34.6	21.4	18.5	12	12.5	18.9	59.7	21.7	18.1	13.6	12.7	10.1	27.9	8.4	2	1.8	16.5	25.8	18.9	8.1	2.9	1.9	3.4	970.5	26.96		889.2	29.64		655.1	36.39
	104	4	5.4	21.4	15.2	16.9	24.1	23.5	23.7	27.6	26.1	11.6	19.8	21.9	6.5	12.5	13.2	9.7	8.7	44.3	2.2	10.7	3.1	5.5	10.9	14.5	11.2	3.6	0.8	0.4	2	2.4	0.5	0.1	1.1	10.5	5.4	0.6	0	0	0	417.6	11.6		399.4	13.31		332.1	18.45
	105	5	4.5	18.2	25.7	34	44.5	31.4	42.6	33.7	41.1	32.9	29.9	23.8	26.3	54.1	25	18.7	15.8	13.2	20	16.9	30.8	15.4	8.8	8.6	8.7	32.1	10.1	10.8	12.4	5.8	5.9	4	1.6	13.4	1	2	24	0	0.1	747.8	20.77		695.8	23.19		515.4	28.63
	106	6	14.5	23.3	17.6	9.4	13.8	10.6	20.8	19.9	16.9	22.6	11.9	11.9	13.4	5.3	38.8	20.4	32.3	11.6	9	4.7	8.4	11.5	12.7	3.2	5	8.9	22.8	11.6	14.4	1.6	5.9	4.1	0.4	11	26.8	2.9	4.5	0.2	0.2	484.8	16.16		428.8	14.29		315	17.5
	107	7	8.5	0.4	0.2	8.4	10.8	3	14.2	10.7	2.8	6.7	1.5	8.3	10	8.2	6	1.7	0.2	8.2	2.2	1.7	7.9	6.6	0.1	0.1	2.3	4.9	6.5	0.1	1.4	5.7	0	0.2	0.1	0	0.1	0	0	1.5	0	151.2	5.04		149.3	4.98		109.8	6.1
	108	8	6.1	0	1.8	13.1	12	20	20.4	20.2	26.7	22.3	26	27.9	9.8	24	28.8	30	12.5	11.8	16.4	21.1	16.4	3.7	19.5	2.5	10.2	1.9	3.3	8.4	1.9	51.2	5.2	0	4.6	1.9	0.6	1.5	0	0.8	0	484.5	16.15		469.9	15.66		313.4	17.41
	112	9	9.4	58.8	82.8	65.2	29.6	12.4	23	34.2	50.5	80.7	137.1	188	255	273.3	297.5	300.2	309.4	326.5	302.7	311.1	311.2	272.4	265.9	252.9	269.5	235.6	211.7	202.1	297.7	268.8	212.5	180.6	187.2	173.9	179.3	148.4	142.6	167	176.2	7302.9	243.43		5735.2	191.17		2533.6	140.76
	113	10	5.7	20.8	35.8	41.6	65.9	34.6	20.5	60.9	29.2	41.2	61.8	29	26.1	24.4	13.5	13.2	34.4	28.5	44.3	12.2	11.6	37.6	54.9	14.2	7.5	30	84.1	41.1	9.6	15.4	14.2	29.4	53.9	15.2	14.8	32	11.4	0.4	0.1	1121	37.37		949.6	31.65		587.1	32.62
	114	11	2.2	72.5	86.4	66.8	7.3	1.2	4	13.4	13.5	10.4	100	119.7	128.1	114.5	89	39.9	73.5	73.4	63.3	71.3	68.5	53.5	94.4	97.8	89.3	92.5	64.1	92.6	90.8	99.1	128.1	102.4	121.4	134.4	114.4	140	134.4	151.4	231.9	3251.4	108.38		1993	66.43		1015.8	56.43
	116	12	0.4	29.1	37.9	17.7	10.3	52.1	67	45.2	15.5	24.3	33.5	39.4	144.4	34.7	161.2	107.3	25.7	27.8	82.6	115.1	56.7	57.9	55.8	157.1	103.4	103.1	126.6	90.7	58.7	11.9	49.6	51.5	37.5	130	58.9	42.8	16.8	5.3	39	2324.5	77.48		1893.1	63.1		873.5	48.53
	112	13	26.8	9	13.6	13.8	23.1	38.1	95.1	160.7	154.7	166.3	174.9	186.3	199.9	194.7	191.3	162.4	203.5	180.8	209.7	194.4	159.4	190.9	195	182.6	198	207.4	195.6	173.8	208.3	218.2	222.9	202.3	261	236.8	212.8	319.8	213.4	256.3	182	6635.6	221.19		4528.3	150.94		2195	121.94
	113	14	5.5	0	5.1	14.8	14.6	31.2	44.7	56.8	64.2	77.2	104.6	132.7	136.4	165.2	137.9	162.7	157.1	159.2	175	166.5	145.6	176.4	164.8	160.2	157	165.3	107.4	169.2	125.5	133.7	140.2	186.5	118.2	137.7	141	116	156.4	125.7	135.8	4574	152.47		3316.5	110.55		1469.9	81.66
	114	15	3.5	0	1.3	11.2	16.6	35.7	63.6	109	117.7	115.9	145.5	186.3	167.5	143.8	189.6	183.9	200	179.5	186.5	181.3	186.6	222.2	171.4	199.3	204.7	232.5	224.4	222.7	262.9	271.1	253.3	275.1	300.9	259.9	292	304.2	306.9	313.5	265.9	7007.9	233.6		4436.2	147.87		1870.6	103.92
	115	16	2.7	0.1	0	2.6	5.3	24.4	130.3	179	154.6	146.2	134.2	138.4	153	156.1	234.8	179.8	165.6	206.7	201.9	193.9	196.8	239.3	193.7	210.4	212.8	209.3	204.8	180.9	217.2	206.5	188.2	154.9	220	265.7	213.1	168.1	216.1	216.5	277.2	6401.1	213.37		4481.3	149.38		2013.8	111.88
		Average:	7.36	24.15	26.45	24.83	20.92	23.91	40.23	51.41	48.19	51.18	64.82	73.3	83.15	79.76	96.89	81.14	80.64	81.99	83.84	84.26	76.54	82.98	82.19	82.97	81.27	85.31	82.34	76.57	83.21	82.36	77.29	74.59	82.98	89.19	80.1	80.45	76.88	77.56	82.06	2665.24	87.83		1944.14	64.8		960.31	53.35
		SEM:	1.67	6.75	6.79	4.94	3.91	3.46	8.51	13.25	12.46	12.84	14.57	17.87	20.92	20.82	23.31	22.53	23.75	24.34	24.43	24.11	23.53	24.73	21.8	23.46	23.93	23.18	21.15	21.13	26.32	25.7	23.95	23.54	26.24	25.2	24.43	27.2	25.47	27.48	27.21	690.66	23.22		475.88	15.86		199.65	11.09
FIGURE 6D
MP-1207 (30 nmol, i.c.v.): AMBULATION (in 50% DMSO/50% Saline (0.9%), 5ul i.c.v.) administered 5 min prior to placement in box.
		Mouse		Average locomotion (XAMB) - Total for time period																																									With 150-min cut off:			With 90-min cut off:
			Start - 05:00	5:00 - 10:00	10:00 - 15:00	15:00 - 20:00	20:00 - 25:00	25:00 - 30:00	30:00 - 35:00	35:00 - 40:00	40:00 - 45:00	45:00 - 50:00	50:00 - 55:00	55:00 - 60:00	60:00 - 65:00	65:00 - 70:00	70:00 - 75:00	75:00 - 80:00	80:00 - 85:00	85:00 - 90:00	90:00 - 95:00	95:00 - 100:00	100:00 - 105:00	105:00 - 110:00	110:00 - 115:00	115:00 - 120:00	120:00 - 125:00	125:00 - 130:00	130:00 - 135:00	135:00 - 140:00	140:00 - 145:00	145:00 - 150:00	150:00 - 155:00	155:00 - 160:00	160:00 - 165:00	165:00 - 170:00	170:00 - 175:00	175:00 - 180:00	180:00 - 185:00	185:00 - 190:00	190:00 - 195:00	Total XAMB:	Average XAMB per 5 min:		Total XAMB:	Average XAMB per 5 min:		Total XAMB:	Average XAMB per 5 min:
	101	1	3.2	0	0	0	0	1.4	1.7	5.6	1.3	1.7	3.4	4.5	9.7	1.1	2.7	8.3	0.1	0	3	0.3	0.4	1.7	8.4	0.3	0	0	0	0	0.3	8.5	25	7.1	0.2	1.5	2.9	0	0.4	0	0	104.7	2.91		67.6	2.25		44.7	2.48
	102	2	1.4	0.3	0.1	0.1	0.4	7.7	3.7	5.9	5.6	12.6	1.8	6.3	9.4	3.4	9.5	2.4	0.7	0	11.5	0.9	4.8	6.2	1.9	0.9	8.1	14.3	2.9	0.9	1.1	1	9.9	21.8	0.1	5.5	0.3	0	0.1	0.3	5	168.8	4.69		125.8	4.19		71.3	3.96
	103	3	16.8	12.1	18.7	5.6	14.8	2.9	27.8	16	0.9	0.2	3.3	0	0	0	2.4	12.5	32.6	5.7	2.6	3	0.1	0.1	0.3	0.7	0	2	0.7	0	0	0	0.9	4.9	20.4	13.3	9.3	5.7	13.9	1.9	0.2	252.3	7.01		181.8	6.06		172.3	9.57
	104	4	3.7	25.8	9.1	14.7	3.2	7.5	2.1	12.3	20.6	0.9	1.7	0.5	6.6	22.7	0.1	0.5	0	0.3	1.7	0.5	0	0.5	6.2	0	3.8	1.1	0	0.1	0	4.4	31.1	7.8	13.3	8.6	9.5	0	0.4	0.2	0	221.5	6.15		150.6	5.02		132.3	7.35
	105	5	6.8	11.5	8.9	19.8	12.3	4.8	2.7	0	6.4	14	1.3	0	0	0	0	1.4	0.1	0	0.3	0.2	0.3	0	0.2	0.2	0.4	0.3	0.8	0	0.1	0.2	0.3	0.2	0.5	0.2	0.4	0.2	9.1	20	12.7	136.6	3.79		93	3.1		90	5
	106	6	1.6	0.2	0.1	0	0	0.3	0.1	1.4	0	1	0.1	0.7	5.1	1.1	1.5	0	4.2	0	15.6	23.6	1.9	17.4	2.3	6.8	8.8	10.4	2.1	10.6	12.6	4	8.4	31.7	3.2	1.3	0.7	13.7	43	22.5	25.7	283.7	9.46		133.5	4.45		17.4	0.97
	107	7	6.2	0.1	0	0.5	2	0.1	0	0.7	0.3	0.1	0	0.1	1	16.5	20.9	2.7	0.4	0.1	1.8	0	0	1	0	3	1.2	0.2	0	0.1	8.1	8.5	6.3	2.2	0.1	0	0	0.1	0.1	0	0.4	84.8	2.83		75.6	2.52		51.7	2.87
	108	8	4.3	2.3	11.9	7.2	8.3	20.1	19.3	2.5	0.2	0	0	5.4	10	8	0.3	0.1	0	0.7	0	0.3	0.1	0.1	0.9	0	0	1	1.3	5.1	3.9	0.6	1.3	0.1	0	0.1	0	0.5	0	0.3	0.2	116.4	3.88		113.9	3.8		100.6	5.59
	109	9	4.1	12.3	13	0	15.8	6.9	8.4	0.4	0.1	2.7	0	0	0.2	0.1	16.2	6.5	1.9	0.4	0.4	0	0.6	0.1	0	0	0	0	0	0.1	0	0.9	0	0.2	0	0	1	15.3	9.9	4.6	5.7	127.8	4.26		91.1	3.04		89	4.94
	110	10	1.7	3	0	0	4.4	17.5	15.5	0.1	1.5	3.4	15.6	3.8	0	0	0	1.7	15.6	0	0	0	0	0	2.2	0.3	18.4	7.5	0.6	0	1	0.9	3.3	0	4.5	1.8	0.2	0	2.2	0.6	0.4	127.7	4.26		114.7	3.82		83.8	4.66
	106	11	1.7	0	0.2	1.2	0	4.1	0.8	0.5	2.6	6.4	0	0.1	0.2	0.1	0	0.6	6.5	2.1	0	0	0.1	0	0.1	0.1	0.2	5.3	1.2	0	0	0.5	0.7	2.1	0.1	1.3	0	0	4.2	1	0.4	44.4	1.48		34.6	1.15		27.1	1.51
	107	12	3.3	0.4	0	0	1.4	0.1	3.4	1.8	0.3	2.1	22.3	7.2	5.7	0	3.3	4.9	7.3	1.7	12.6	13.3	12.2	20.3	20.3	13.1	13.6	4.5	3	15.5	1.8	6.5	1.7	6.1	40.5	11.3	36.9	1	3.4	2.6	2.4	307.8	10.26		201.9	6.73		65.2	3.62
	108	13	1	0	0	2.7	1	0.9	7.7	11.2	18.8	19.7	7.6	14.9	11	5.1	9.7	11.1	3.3	2.9	25.5	1	0.6	9.8	8	0.2	1.2	1.3	3.9	6.4	0	4.4	0.4	1.2	2.3	17.1	1.6	0	0.7	0.7	0.2	215.1	7.17		190.9	6.36		128.6	7.14
	109	14	2.3	0	0.6	0	0.5	0.1	1.1	0.2	0	0.4	1.9	1.4	0.3	5.9	2.9	1.4	0.1	0	5.4	2.2	0.8	0.7	1.3	0.1	4.2	0.3	1.4	16.5	1.7	0.1	0.5	5.5	8	0.1	4.4	3.4	0.3	0.4	5.4	81.8	2.73		53.8	1.79		19.1	1.06
	110	15	1.1	7.2	0	0	0	3.2	1.1	1	0	0	0	0	0	0.2	0	0.4	0.2	0	0.1	0.1	3.6	4.7	0.3	0	0.5	6.7	0	0	0	0	0	0.5	0	0	0.1	0	0.5	0.8	0	32.3	1.08		30.4	1.01		14.4	0.8
	106	16	1.8	0	0.3	0.5	0	1.6	0	0.7	0.4	2.9	5.7	0.1	0	0.2	8.2	0.9	1.5	0.5	5.1	8.3	1.9	0.5	4.8	2.8	0.1	5.5	0.5	0.6	0.1	1	9.6	1.1	5.7	8.8	9	1	1.3	0.9	0.6	94.5	3.15		56.5	1.88		25.3	1.41
	107	17	1.1	1.6	0	0	0.2	2.8	7.4	9.3	8.7	0.6	3.3	0.1	0.8	12.8	3.1	0.6	0.7	1.5	1.3	4	0.7	1.3	3.3	0.6	2.6	19.5	2.7	0.3	1.4	4.6	0.6	0.3	5.5	10.2	0.4	9.8	1.3	0.5	23.2	148.7	4.96		96.9	3.23		54.6	3.03
	108	18	1.3	0.5	0.2	1.3	1.7	1.9	0.6	0.2	0.8	2.1	11.7	1.5	9.5	0.2	0	0	0.2	0	0.4	0	0	8.8	0	0	0.1	0	0	0.3	9.9	0.2	0	0	0.1	0.1	3.9	7	13.4	9.8	3.3	91	3.03		53.4	1.78		33.7	1.87
	109	19	1.5	0	0	0.1	0.1	0.2	3	0.2	0	7.5	5.8	2.2	5.4	1.8	2.7	10.7	3.2	6.1	3.9	1.4	3.6	0.6	4.9	8.9	2.3	3.6	6.7	1.7	17.5	1.8	2.4	8.4	1.3	0.7	1	13.5	1.5	9.3	0.7	146.2	4.87		107.4	3.58		50.5	2.81
	110	20	1	0	0.2	0.1	6	8	10	4.2	3.4	5.4	3	0.7	1.2	7.5	0.8	1	0.7	3.2	1.2	2.1	1.3	3.2	4.7	0.5	0.3	1.3	10.4	0.9	0.8	0.2	1	5.9	2.7	6.1	3.8	2	3.3	4.3	3.9	116.3	3.88		83.3	2.78		56.4	3.13
	109	21	0	0	0.5	0.5	2.2	1.6	1.9	0	4.2	0	2.4	1.3	0.6	4.3	0.1	5.4	9	5.5	6.3	16.2	7.8	21.4	0.6	10.1	6.1	32.7	12.5	9.1	1.5	7.5	1.9	9.8	5.8	9.9	6.2	8.1	9.9	4.3	5.7	232.9	7.76		171.3	5.71		39.5	2.19
	110	22	0.7	0.2	0.3	0.3	6	0.5	0	0	0.2	2.9	0.7	2.4	4.6	3.4	2.6	3	4.7	1.2	0	2.7	6.3	3.5	2.5	1.4	0.5	7.8	0.1	2.3	10.5	16.9	1.8	4.8	11	7.8	12.4	7.4	1.7	0	3.1	138.2	4.61		88.2	2.94		33.7	1.87
	111	23	22.2	9.9	12.5	2	8.9	4.3	4.9	0.1	1	0.1	0.3	14	2.8	1.1	0.8	0	0	0	0.2	0.7	0.4	9.5	1.8	0	0.2	0	0.1	0.4	0	0.1	0	0	0.6	0.1	1.4	0	0.7	0	0	101.1	3.37		98.3	3.28		84.9	4.72
	112	24	10.9	16.2	11.3	8.6	11.9	3.4	0	5.6	17.4	8.3	2.2	2.1	0	1.6	0	0	2.7	14.8	0.1	0.3	4.1	1.2	0.2	11.8	3.8	0.1	0	0	0	0	0	0.9	3.2	7.6	0	0	1.6	0	0.1	152	5.07		138.6	4.62		117	6.5
	113	25	0.2	0	0	0	0	0	0.2	0.1	3.3	5.4	1.8	7.3	4.7	0.7	5.6	1.6	0.3	6.1	3.7	1.5	0.8	8	0.1	0	0	1	11.3	4.5	0	0	7.9	18	0.4	0.3	4.8	0.8	10.5	23.4	27.2	161.5	5.38		68.2	2.27		37.3	2.07
	114	26	21	8.7	16.9	8.5	5	7.4	5.6	13.3	5.2	10.3	0.8	1.5	0.6	0.4	0.9	0.9	0	0	1.5	0.6	1.1	9.7	0.3	0	0.1	0.2	0.1	0.1	0.2	0	3.9	0	0.2	0	0	0	0	0	0	125	4.17		120.9	4.03		107	5.94
		Average:	4.65	4.32	4.03	2.83	4.08	4.2	4.96	3.59	3.97	4.26	3.72	3	3.44	3.78	3.63	3.02	3.69	2.03	4.01	3.2	2.06	5.01	2.91	2.38	2.94	4.87	2.4	2.9	2.79	2.8	4.57	5.41	4.99	4.37	4.24	3.44	5.13	4.17	4.87	146.66	4.7		105.47	3.52		67.21	3.73
		SEM:	1.21	1.31	1.22	1	0.98	0.99	1.33	0.95	1.18	1	1.05	0.8	0.76	1.12	1.04	0.74	1.36	0.66	1.19	1.14	0.58	1.26	0.85	0.8	0.91	1.47	0.72	0.95	0.93	0.79	1.5	1.51	1.72	1	1.48	0.97	1.75	1.39	1.59	13.52	0.43		9.19	0.31		8.04	0.45
MP-1207 (100 nmol, i.c.v.): AMBULATION (in 50% DMSO/50% Saline (0.9%), 5ul i.c.v.) administered 5 min prior to placement in box.
		Mouse		Average locomotion (XAMB) - Total for time period																																									With 150-min cut off:			With 90-min cut off:
			Start - 05:00	5:00 - 10:00	10:00 - 15:00	15:00 - 20:00	20:00 - 25:00	25:00 - 30:00	30:00 - 35:00	35:00 - 40:00	40:00 - 45:00	45:00 - 50:00	50:00 - 55:00	55:00 - 60:00	60:00 - 65:00	65:00 - 70:00	70:00 - 75:00	75:00 - 80:00	80:00 - 85:00	85:00 - 90:00	90:00 - 95:00	95:00 - 100:00	100:00 - 105:00	105:00 - 110:00	110:00 - 115:00	115:00 - 120:00	120:00 - 125:00	125:00 - 130:00	130:00 - 135:00	135:00 - 140:00	140:00 - 145:00	145:00 - 150:00	150:00 - 155:00	155:00 - 160:00	160:00 - 165:00	165:00 - 170:00	170:00 - 175:00	175:00 - 180:00	180:00 - 185:00	185:00 - 190:00	190:00 - 195:00	Total XAMB:	Average XAMB per 5 min:		Total XAMB:	Average XAMB per 5 min:		Total XAMB:	Average XAMB per 5 min:
	101	1	2.3	0	3.2	0.5	0.1	0.8	13.5	3.3	10.3	0.2	0	0	0.2	0	0.2	8.1	8.6	10.4	0	0	0	0	0	0	0	0.2	0.8	0.6	0.1	0.1	0.1	0.4	0.1	0	0.3	0	1	0	0.5	65.9	1.83		63.5	2.12		61.7	3.43
	102	2	0.3	0.6	5.8	4.7	4	2.4	0	0	0	0	0	0	0.3	0.2	8.7	2.9	0.1	0.2	0	0.1	0	0	0.4	0.3	0	0	0	0.1	5.5	1	0	0.4	0.1	0	3.5	0.4	0.1	0.9	0.2	43.2	1.2		37.6	1.25		30.2	1.68
	103	3	0	0	0	0.8	0	0	0	0	2.2	0.5	0	0.1	0	4.1	9.9	2.9	0	0.1	0	0	0	0.1	0	0	0	0.1	1.3	13.6	0	0	0.4	0.4	0	0.2	0.2	0.2	0.6	3.4	8.1	49.2	1.37		35.7	1.19		20.6	1.14
	104	4	0.1	0	0	0	0	0	0	0.1	3.1	0.4	0.1	0.5	0.3	0.2	0.5	2	0.9	1.6	0.7	6.2	0.7	1.9	0.6	2.3	1.3	0.5	3.9	1.1	5.9	5.7	4.5	3.2	5.6	10.7	4.9	5.2	9.4	6.6	7.7	98.4	2.73		40.6	1.35		9.8	0.54
	105	5	0	0	0	0	0	0.7	0.3	0.6	0	1.6	1	3.7	2.1	3.6	3.5	2.3	4.1	1.4	0.9	4	0.7	10.1	6.5	3	1.6	1.6	1.4	2.6	2.8	3.1	5.9	2.8	3.7	2.5	3.1	3.6	4.3	3.6	3.9	96.6	2.68		63.2	2.11		24.9	1.38
	106	6	1.7	0.1	0	0.8	0	0	4.4	4.3	1.6	0.4	1	0.1	0.1	1	0.3	0.2	0.2	10	1.4	4.4	3	4.2	2.9	0	0	0	0	0	0	0	0	0	0	0	1.2	3.8	3	0.3	0.9	51.3	1.71		42.1	1.4		26.2	1.46
	107	7	1.8	0	0	0	0	0	0	2.4	0	0.6	2	0.1	0.6	0.5	0	0	3.7	0.5	0.1	0	0	0.1	1.7	0	0.7	3.2	0.8	1.9	0.3	0.1	3.6	1.1	1	1.6	2.1	0.7	3.2	2.3	7.4	44.1	1.47		21.1	0.7		12.2	0.68
	108	8	1.9	0.3	0.1	0	0	0	0.9	1	2.5	4.4	3.9	1.2	4.3	1.6	4.4	1.4	4.9	4.1	3	2.8	9.4	4.6	4.8	5.6	9.6	8.7	8.8	9.8	12.1	15.4	20.3	22	26.7	25.6	26.4	31.6	27.9	29.7	33.5	375.2	12.51		131.5	4.38		36.9	2.05
	109	9	1.7	1.1	0.7	1.3	0.7	1.5	0.7	8	7.9	2.1	0.2	0	0.1	0.1	0.3	0	0.3	0	6.7	12	2	0.5	0.5	1	0.3	0.5	0.5	0.4	0	2.4	0.1	0	0	0	0.7	0.6	0.3	0.2	0.1	55.5	1.85		53.5	1.78		26.7	1.48
	110	10	3.3	0.4	0.1	0.1	0	1.7	2	5.3	2.2	2.2	2.8	2.4	0.9	1.8	1.9	0.9	0.5	0.6	1.7	0.1	1	0.5	2.8	1.2	0.9	1.3	4.7	0.1	3.9	0.2	0.1	3.4	1.5	1.1	1.1	1.7	3.5	5	2.8	67.7	2.26		47.5	1.58		29.1	1.62
		Average:	1.31	0.25	0.99	0.82	0.48	0.71	2.18	2.5	2.98	1.24	1.1	0.81	0.89	1.31	2.97	2.07	2.33	2.89	1.45	2.96	1.68	2.2	2.02	1.34	1.44	1.61	2.22	3.02	3.06	2.8	3.5	3.37	3.87	4.17	4.35	4.78	5.33	5.2	6.51	94.71	2.96		53.63	1.79		27.83	1.55
		SEM:	0.36	0.12	0.62	0.45	0.4	0.28	1.33	0.86	1.09	0.43	0.43	0.4	0.43	0.47	1.16	0.76	0.92	1.28	0.66	1.24	0.91	1.04	0.7	0.58	0.93	0.85	0.89	1.5	1.25	1.52	1.99	2.11	2.61	2.59	2.5	3.03	2.65	2.81	3.17	31.79	1.07		9.56	0.32		4.56	0.25
FIGURE 6E
MP-1208 (35 nmol, i.c.v.): AMBULATION (in 50% DMSO/50% Saline (0.9%), 5ul i.c.v.) administered 5 min prior to placement in box.
Date:		Mouse		Average locomotion (XAMB) - Total for time period																																									With 150-min cut off:			With 90-min cut off:
			Start - 05:00	5:00 - 10:00	10:00 - 15:00	15:00 - 20:00	20:00 - 25:00	25:00 - 30:00	30:00 - 35:00	35:00 - 40:00	40:00 - 45:00	45:00 - 50:00	50:00 - 55:00	55:00 - 60:00	60:00 - 65:00	65:00 - 70:00	70:00 - 75:00	75:00 - 80:00	80:00 - 85:00	85:00 - 90:00	90:00 - 95:00	95:00 - 100:00	100:00 - 105:00	105:00 - 110:00	110:00 - 115:00	115:00 - 120:00	120:00 - 125:00	125:00 - 130:00	130:00 - 135:00	135:00 - 140:00	140:00 - 145:00	145:00 - 150:00	150:00 - 155:00	155:00 - 160:00	160:00 - 165:00	165:00 - 170:00	170:00 - 175:00	175:00 - 180:00	180:00 - 185:00	185:00 - 190:00	190:00 - 195:00	Total XAMB:	Average XAMB per 5 min:		Total XAMB:	Average XAMB per 5 min:		Total XAMB:	Average XAMB per 5 min:
	101	1	0	0	0.1	1.1	0.5	2.2	1.3	1.9	0.9	9.2	4.9	9.3	3.2	5.4	6.9	4.5	7.8	2.7	2.9	5.3	1.2	5.6	2.2	1.7	3.2	4.2	1.6	3.2	0.6	3.2	2.5	0.7	8.2	1.8	3.1	1.7	1.1	2.6	1.4	119.9	3.33		96.8	3.23		61.9	3.44
	102	2	4.1	2	0	2.4	5	0	1.6	0	0.1	0.2	0	0.1	10.8	2.3	4.5	7.5	0.4	0.6	0	0.1	0	0.1	0	0.6	0	19.7	3.6	17.8	0.2	0	0	0.9	12.8	6.8	0.7	0.4	0	0	0	105.3	2.93		83.7	2.79		41.6	2.31
	103	3	15.3	7.5	6.8	0.6	12.7	4.7	3.1	0.3	0.6	24.2	3.4	0	0.3	0	0.2	0	1.9	2	0	0.1	2.2	0.3	0	0.1	0.3	0.2	0.3	0	0.6	5.6	4.3	0.1	0.3	0.8	0.1	0.1	0.1	0.1	0	99.2	2.76		93.3	3.11		83.6	4.64
	104	4	2.9	0	0	1.4	2.8	0.8	0.2	4.9	9.9	7.7	11.7	13.2	6.6	14.6	4.3	13.9	3	5.2	6.8	2.8	8.9	3.6	0	4	11.2	1.5	7.5	9.9	1.8	2	8.6	4.2	1.6	9.5	0.9	0.3	4.4	0.3	13.4	206.3	5.73		163.1	5.44		103.1	5.73
	105	5	4	0	0	0.4	1.3	0.1	0	0	2.1	5.8	20.1	8.1	10.1	1.9	5.1	0.9	4.3	6.7	0.9	2.1	1.6	4.1	0.5	0.5	6.4	1.1	1.4	4	1.2	3.4	9	0.7	0.7	0.3	6	2.6	0.3	19.4	22.5	159.6	4.43		98.1	3.27		70.9	3.94
	106	6	2.9	0	0	0	0	0	0.2	3.9	2.7	10.1	1.4	14.3	9.7	8.9	4.9	4.6	3	6.7	3.1	1.1	8.3	2	5.6	3	0.1	0.7	2.1	0.5	0	0	1.7	0	1.2	1.2	1.1	2.2	1	0.8	11.1	120.1	4		99.8	3.33		73.3	4.07
	107	7	2.4	0	0.1	0	0	0	0	0	0.3	1.3	2.2	2.5	4.2	5.4	8.1	2.9	2.1	0.1	1.3	11.3	5.1	5.6	3.9	0.5	3.9	11	2	20.1	9.8	1.8	9.2	2.8	16.3	10.2	0.9	0.5	16.5	9.1	0.6	174	5.8		107.9	3.6		31.6	1.76
	108	8	1.9	0	0	0	0.9	0	0	0	0	0	0.3	0	0	1.3	2.9	4	4.1	3.8	5.6	6.9	11.9	9.2	5.9	11.1	2.4	0.3	0.5	5.3	9.8	6.4	5.2	4	0	6.6	7.2	1	2.7	4.7	6.8	132.7	4.42		94.5	3.15		19.2	1.07
	109	9	2	0	4.2	0.6	8.9	0.9	3	5.5	6.6	2.8	1.2	0.1	0	5.4	5.6	6	11.2	0.2	0	1.3	0	0.5	6.2	6.1	0	0.4	0	0.1	0	0.1	0.2	0.1	0	0	0	3.3	1.9	0.6	0	85	2.83		78.9	2.63		64.2	3.57
	110	10	1.1	0.4	0.4	7.2	1.3	4.3	2.4	4.8	8.4	7.1	8.2	9.1	2.1	8	7.7	0	0	1.5	6.1	0	0.2	0	0	3	2.5	0	0	0	0.8	0	0	0	0.1	0	0	0	0	0	0.2	86.9	2.9		86.6	2.89		74	4.11
		Average:	3.66	0.99	1.16	1.37	3.34	1.3	1.18	2.13	3.16	6.84	5.34	5.67	4.7	5.32	5.02	4.43	3.78	2.95	2.67	3.1	3.94	3.1	2.43	3.06	3	3.91	1.9	6.09	2.48	2.25	4.07	1.35	4.12	3.72	2	1.21	2.8	3.76	5.6	128.9	3.91		100.27	3.34		62.34	3.46
		SEM:	1.35	0.75	0.75	0.69	1.36	0.58	0.41	0.75	1.18	2.25	2.02	1.82	1.37	1.38	0.74	1.32	1.08	0.8	0.84	1.17	1.37	0.97	0.86	1.08	1.13	2.05	0.72	2.36	1.23	0.75	1.2	0.53	1.92	1.3	0.82	0.37	1.59	1.97	2.46	12.59	0.37		7.47	0.25		7.95	0.44
																			RESPIRATORY DEPRESSION FIGURE 6A-C
Saline effects, ICV: RESPIRATION: (in 0.9% Saline, 5ul i.c.v.) administered 5 min prior to placement in box.
		Mouse		Average respiration (BPM) - Total for time period																																									With 150-min cut off:			With 90-min cut off:
			Start - 05:00	5:00 - 10:00	10:00 - 15:00	15:00 - 20:00	20:00 - 25:00	25:00 - 30:00	30:00 - 35:00	35:00 - 40:00	40:00 - 45:00	45:00 - 50:00	50:00 - 55:00	55:00 - 60:00	60:00 - 65:00	65:00 - 70:00	70:00 - 75:00	75:00 - 80:00	80:00 - 85:00	85:00 - 90:00	90:00 - 95:00	95:00 - 100:00	100:00 - 105:00	105:00 - 110:00	110:00 - 115:00	115:00 - 120:00	120:00 - 125:00	125:00 - 130:00	130:00 - 135:00	135:00 - 140:00	140:00 - 145:00	145:00 - 150:00	150:00 - 155:00	155:00 - 160:00	160:00 - 165:00	165:00 - 170:00	170:00 - 175:00	175:00 - 180:00	180:00 - 185:00	185:00 - 190:00	190:00 - 195:00	Total BPM:	Average BPM:		Total BPM:	Average BPM::		Total BPM:	Average BPM:
		1	322.2	282.6	154.8	149.8	267.6	191.4	136.4	232.4	241.2	136.4	102.4	189	152	88.2	93.4	87.4	69.4	78	72.4	84.4	83.2	87.6	101.8	83.8	75	67.8	258.8	256	269.6	181.6	157	160.6	68.6	81.8	74.4	205	188	77.8		5609.8	143.84		4596.6	153.22		2974.6	165.26
		2	289	256.6	182.2	261.6	202.4	139.6	118	100.6	124.6	169	256	198.2	132.6	155.4	91.6	90.6	98.6	117.6	88.6	113.4	90	86.8	100.2	90.2	86.8	102	90.8	94	84.6	79.4	101.6	298	348.4	275.6	264.2	246.2	242	175.4		6042.4	201.41		4091	136.37		2984.2	165.79
		3	352	262.6	201.2	139	263.4	189.4	99	216.8	391	211.4	175.8	408.6	234.4	144.8	70.8	363.2	196.6	64.8	371.8	246.6	118.8	176.6	322.6	181.2	102.8	218.2	125.2	105.4	45	47.6	48.4	51.2	48.6	54.6	48.4	264.2	294.8	187.2		7044	234.8		6046.6	201.55		3984.8	221.38
		4	311.2	249.6	341.6	346.6	283	362	244.6	300.2	318.4	270.2	284.2	297.4	286.2	329.8	224.2	234.8	175.2	173.2	237.4	234.6	253.4	320.7	277	294.8	290.2	231.2	291.4	289.6	261.7	231.2	255	226.4	263.6	255.2	84.4	352.8	304.6	343.6		10331.2	264.9		8245.6	274.85		5032.4	279.58
		5	276.2	234.4	246.2	200.8	195.8	266.2	232.4	202.2	226.8	150.2	173.8	79.2	68.6	132.4	264.4	116.6	182.2	234.4	193.8	185.8	186.3	73.2	41	65.4	34	30.2	34.2	32.8	36.4	48.8	44.8	237	336.4	267.2	200.8	213.2	154.7	87.6		5986.4	153.5		4444.7	148.16		3482.8	193.49
		6	316.2	276.6	218	185.2	104.6	224	265.2	142.4	226	115	173.2	58.8	86.2	195.4	58.2	135.8	94.2	33	27.4	52.6	12.7	17.9	21.4	22.8	23.8	21	22	19.6	19.5	12	14.8	13.2	13.8	11.4	219.4	171	179	152.8		3956.1	101.44		3180.7	106.02		2908	161.56
		7	261.2	270.6	301	205.4	264.6	273	168.2	126.6	117.6	91.8	91.4	144.6	75.4	88.8	130.6	286.8	217.8	154.6	153.4	69.4	65.5	66.8	76.2	75.8	71.6	81.4	69.8	72.8	69.9	68.4	78.2	69	210.8	270.6	160	152.6	54.8	48		5255	134.74		4211	140.37		3270	181.67
		8	203	186.4	202	201.4	98	99	140.4	217.6	135.2	99.2	102.4	101	95	87	81.6	76.8	70.8	81	81.6	85	85.6	96.4	193.6	217.4	173.8	98.2	171.6	106.6	64.4	68.2	93.8	66.8	75.4	58.4	68					4082.6	104.68		3720.2	124.01		2277.8	126.54
		9	247	223	225	168.2	116.2	108.6	102.8	190.2	159.4	107.8	80.4	85.4	76.8	69	88.8	86.4	74.8	69	74.2	83.6	78	70	76.6	75	79.6	76.4	77.8	75.2	80.4	70.2	76.2	83.2	60.8	58	61.8					3535.8	90.66		3195.8	106.53		2278.8	126.6
		10	268.6	260.2	228.4	171.6	257.8	280.6	197.2	113.2	110.8	76	77.6	230.4	178.8	70.8	65.8	105.4	232.4	167.2	132.4	122.2	63.8	59	65.8	59.8	59.2	64.2	70	72.2	77.8	72.2	62.6	63	76.2	56.2	67.6					4337	111.21		4011.4	133.71		3092.8	171.82
		11	241.8	239.8	294.6	259	243.8	179.4	166	248.4	249.4	117	110	101.8	91.8	94	95	125	89.4	93	107.6	107.2	96.4	108.8	132.6	259	303.6	263.6	181.2	155.2	160.8	114	84.2	78	87.8	86.4	99.8					5465.4	140.14		5029.2	167.64		3039.2	168.84
	113	12	308.6	317.5	325.2	282.9	272.4	249.4	331	262.6	283.2	265.6	260.7	257.3	213.2	225.8	235.2	283.2	256.6	248.2	257	229.4	254.6	196.2	166.7	250.6	167.5	159.9	200.7	248.7	177.6	187.6	171	190.1	206	172.8	177.7	188.3	188.2	152.8	162.5	8984.5	230.37		7375.1	245.84		4878.6	271.03
	114	13	328.8	269.5	276.6	219.1	179.6	340.8	210.2	196.4	145.8	134.2	295.6	146.1	119.7	178.4	154.6	152.2	151.8	102.8	132	126	240.2	244.1	227.2	154.2	196.1	165.4	137.9	197.1	146.2	166.6	137	118.9	148	122	71	97.6	80.4	131	177.5	6818.6	174.84		5735.2	191.17		3602.2	200.12
	115	14	341.8	324.3	313.8	256.8	263.4	211.6	282.8	163.8	184.6	163.8	246.2	204.4	151.6	177.8	197.4	143.8	146.4	135.1	154	190.6	262.4	195.9	136.1	189.2	210.2	218.5	178.1	181.6	184.6	199	169.4	189.4	193.4	176.2	168.9	164.1	193.8	187.6	202.4	7854.8	201.41		6209.6	206.99		3909.4	217.19
	116	15	301.2	346.5	328.1	271.6	327.6	202.2	301.2	220.2	249.4	195.4	206.6	200	213.2	193.2	222.8	183.2	215.2	225.3	226.2	240	197.6	255.1	338.1	306.8	229	234.5	202.1	171.6	218.4	118.2	94	180.2	186.6	184.4	152.5	230.7	179.4	164.9	167.7	8680.9	222.59		7140.5	238.02		4402.9	244.61
		Average:	291.25	266.68	255.91	221.27	222.68	221.15	199.69	195.57	210.89	153.53	175.75	180.15	145.03	148.72	138.29	164.75	151.43	131.81	153.99	144.72	139.23	137.01	151.79	155.07	140.21	135.5	140.77	138.56	126.46	111	105.87	135	154.96	142.05	127.93	207.79	187.25	155.34		6265.63	167.37		5148.88	171.63		3474.57	193.03
		SEM:	10.66	10.51	15.35	14.78	18.22	19.7	19.25	14.74	21.05	15.43	20.31	24.35	17.37	18.44	18.46	22.65	16.72	17.26	23.25	17.84	21.7	22.77	25.92	24.38	23.43	21.09	20.72	21.55	21.19	17.14	15.99	21.41	27.17	23.91	17.56	20.24	23.07	23.49		519.54	14.36		406.05	13.53		215.76	11.99
50%DMSO effects, ICV: RESPIRATION (in 50% DMSO/50% Saline (0.9%), 5ul i.c.v.) administered 5 min prior to placement in box.
		Mouse		Average respiration (BPM) - Total for time period																																									With 150-min cut off:			With 90-min cut off:
			Start - 05:00	5:00 - 10:00	10:00 - 15:00	15:00 - 20:00	20:00 - 25:00	25:00 - 30:00	30:00 - 35:00	35:00 - 40:00	40:00 - 45:00	45:00 - 50:00	50:00 - 55:00	55:00 - 60:00	60:00 - 65:00	65:00 - 70:00	70:00 - 75:00	75:00 - 80:00	80:00 - 85:00	85:00 - 90:00	90:00 - 95:00	95:00 - 100:00	100:00 - 105:00	105:00 - 110:00	110:00 - 115:00	115:00 - 120:00	120:00 - 125:00	125:00 - 130:00	130:00 - 135:00	135:00 - 140:00	140:00 - 145:00	145:00 - 150:00	150:00 - 155:00	155:00 - 160:00	160:00 - 165:00	165:00 - 170:00	170:00 - 175:00	175:00 - 180:00	180:00 - 185:00	185:00 - 190:00	190:00 - 195:00	Total BPM:	Average BPM:		Total BPM:	Average BPM::		Total BPM:	Average BPM:
	117	1	206.4	239.2	236.6	213.6	219.8	247	166.4	229.8	215.6	147.6	207.6	246.8	210.4	70.4	139.4	152.8	66.4	64.6	75.2	102	179	89	49.6	69	54.8	56.6	62.2	64.6	64.8	56.2	70.6									4274	109.59		4203.4	140.11		3280.4	182.24
	118	2	162.6	212.8	205.6	186.4	74.8	84.6	96.2	71	67.8	118	61.8	60.4	58.8	61	55.4	60.6	66.6	65.6	50.4	51.4	51.6	61.2	54	55.2	55	44.6	54.8	107.4	150.4	215.2	122.8									2844	72.92		2721.2	90.71		1770	98.33
	119	3	164	175	127	207.6	181.4	159	188	88.8	82.2	74.6	80.6	114.2	79.8	84.4	70.6	71.2	72.8	69.8	58	55.6	57.8	83.4	219	198.6	148.8	112.4	63.2	78.2	75.8	69.2	65.6									3376.6	112.55		3311	110.37		2091	116.17
	120	4	147	120.8	161.6	207.8	166.4	88.2	89.8	81.8	83.4	89.6	89.8	78	83.2	85.8	174	129.4	85	78	88	88.6	118.8	79.6	83.2	90.8	83.6	90	91.2	80.8	94.6	97	87.8									3213.6	107.12		3125.8	104.19		2039.6	113.31
	129	5	155.8	121.2	110.8	120.6	93.6	129.8	91.4	82.8	90.8	74.8	75.4	78	97.2	91.4	69	74.8	74.4	82.6	211	183.2	226	108.4	56.6	67.8	62.6	59.8	70.2	64	61.4	63.4	71.2									3020	77.44		2948.8	98.29		1714.4	95.24
	130	6	153.4	208.4	204.6	156.4	155	104.6	42.6	39.4	43.8	37.8	52.6	71.6	173	110.6	51.2	40.6	45	35.2	46	40.8	33.4	34.4	39.4	56.6	37.8	46.8	42	50.2	124.4	90.6	63.4									2431.6	62.35		2368.2	78.94		1725.8	95.88
	131	7	145.4	88.2	77.6	72.2	110	122.6	155.6	129	44.8	29	34.4	29.4	32.8	32.6	33.4	25.8	95.6	135.8	87.2	25.8	35	33	29.8	30.4	31.2	41.4	42.4	30	36.4	33.4	36.2									1886.4	48.37		1850.2	61.67		1394.2	77.46
	132	8	174.8	180.4	151.2	181	189.4	192	108.8	101	101.8	100.8	111.2	102.8	99.6	100.2	101.4	91	174.8	142.6	84	83.4	89.4	88	89	96.6	91	95	85.8	159.2	194.6	92.4	96.4									3749.6	96.14		3653.2	121.77		2404.8	133.6
	109	1	122.8	217.4	220.2	177.8	115.6	167.8	113	83.6	84.6	73.8	103.8	115.8	252.2	171.8	123	77.4	65.8	57.2	57.4	60.4	54.4	51.6	55.8	51.8	51.2	49.8	47	55.8	50.8	51.2	52.2	55.4	47	57.6	52.6	254	193.2	225.4	248.2	4166.4	106.83		2980.8	99.36		2343.6	130.2
	110	2	248.6	219.8	126.4	109	113.2	90.2	218.4	134.2	75.8	67.8	79.8	58	55.2	45.8	51.6	66.8	319	250.4	176.4	131.8	95	147.2	53.4	60.4	58.8	63.4	61.2	58.4	55.8	62.4	62.4	66.4	54.4	62.4	55.8	60.2	64.2	64.8	61.4	3906.2	100.16		3354.2	111.81		2330	129.44
	111	3	170.6	238.4	198.2	104.6	174.4	86.6	57	54.6	58.4	121.8	40.6	48.4	47	62.4	44.6	43	80.4	230.2	143.6	102.8	127.6	49.2	38.8	36.8	39.8	43.4	42.2	45.6	38.6	42.8	37.2	39	39.6	33.8	36	40.4	37.6	32.6	48	2956.6	75.81		2612.4	87.08		1861.2	103.4
	112	4	233.2	258.6	309.4	201	173.8	154.2	115.2	107.8	150.6	272	167.6	142	163.2	87.4	88.6	91.4	87.6	89.6	89.4	104.6	100.4	97.2	97.4	93.8	112.2	146.2	92	86.8	94.4	86.2	94.4	84.4	89	82.8	86.4	130.2	89.8	90	85.8	4926.6	126.32		4093.8	136.46		2893.2	160.73
	113	5	166.8	145.4	191	113.8	81.6	134.2	71.6	39	37.2	30.4	58.8	43.4	40	29.6	38	33.4	42.2	24	47.8	36.8	39.2	44.8	37.2	35	39.8	44.2	40.2	32.4	29.6	29.6	184.6	240	195.6	109	127.6	129.6	79.4	41.4	28	2912.2	74.67		1777	59.23		1320.4	73.36
	114	6	122	109.2	91.6	66.6	56.2	57.8	90.4	98.8	83.6	64.4	14.2	15.6	17.6	12.6	50	11	11.2	12.4	9.6	12.6	7.8	9.8	18.6	114.2	30.2	9	12.8	15.4	11.2	10.8	10.2	9.4	4.6	6.8	7.8	4.6	6.8	4.8	4.2	1306.4	33.5		1247.2	41.57		985.2	54.73
	115	7	242.8	216	221.6	107.4	44	231	222.2	99.2	31	80.4	26.8	28.6	35.4	30.6	36.8	38.2	46	40.8	36.6	38	33	32	43.4	39.6	40.6	24.2	20.2	29	28.4	112.4	39	24	28.6	94	171	217.8	228	181.4	97.8	3337.8	85.58		2256.2	75.21		1778.8	98.82
	116	16	223.8	152.2	211.6	178	159.2	100	70	94.8	40.4	39.4	49.2	45.6	224.8	139.2	205.2	45.4	43	42.4	56.4	43.8	47.2	46.2	39.8	39.8	53.8	47.6	56.8	46	39.8	34.4	21.8	110.4	176	101.4	112.2	22.8	21	39.2	28.8	3249.4	83.32		2615.8	87.19		2064.2	114.68
	113	17	298.6	156.8	147.8	65.6	165.4	133.2	129	32	29.2	25.4	63	218.4	104.6	38.6	33.4	19.4	20.6	51.2	19	28.4	28.6	26.6	18.8	23.2	30.5	155.6	106.2	72	18.6	21.8	28	26.8	53.4	28.6	33.6	34.2	30.8	29.8	39.8	2586.5	66.32		2281.5	76.05		1732.2	96.23
	114	18	42.2	57.6	72.6	162.8	95.2	58.2	36.4	81.2	101.2	23.8	70	222.2	124.2	67.6	22.6	13.4	13.4	11.4	21.8	13.6	13.2	12.2	19.4	14.4	19.9	15	13.2	54.6	202.2	174	98.4	48.6	11.6	12	27.8	9	11.2	18.6	10.6	2097.3	53.78		1849.5	61.65		1276	70.89
	115	19	149.8	124.4	183.2	142.6	99.2	174.2	46.2	49.8	50.6	56.6	224.8	80.2	32.4	37.8	36.4	38.6	27.4	41.4	44.6	20	34.8	27.2	28.2	30	90.9	214.6	150.8	139.8	83	15.2	16.8	21	17.4	22.4	32.6	27.2	24	26	28	2690.1	68.98		2474.7	82.49		1595.6	88.64
	116	20	223.4	140.4	150	200.8	91	66.8	72.6	167.6	181	90.2	29.8	30.2	45	22.4	31.2	33	77	29	23	27.4	26.4	36.6	40.8	22.4	16.7	17.8	18.8	13	11.4	20.8	15	17.6	18.2	18.2	148.6	181.8	152.8	119.4	60.2	2688.3	68.93		1956.5	65.22		1681.4	93.41
	125	21	299.2	282.2	272.6	168.6	201.4	121.6	99.6	297.2	149.6	71	43.2	47.6	55.2	44.6	136.8	261.6	42	144	100	65.8	41.4	47.2	49.4	50	59.5	45	46.6	40.2	53.6	44.8	38.2	36.4	34.6	213.2	225.8	288.2	256.2	168.4	143.2	4785.7	122.71		3381.5	112.72		2738	152.11
	126	22	325.6	330.4	260.8	238	191.8	242.6	200.6	87.8	139.2	230.4	202	72.8	110.4	165.8	92	84.2	96	94.6	96.2	101.6	102.8	89.4	89.2	91.6	91.4	129.2	76.6	81	70.6	104.4	79.2	81.4	89.2	93.2	84.4	82.6	96.8	245	290.4	5431.2	139.26		4289	142.97		3165	175.83
	127	23	231.8	320.4	243.4	232	167.4	215.6	252.8	251.4	177.8	110	139.4	116.2	102.8	237.2	246.8	186.4	85.2	96.6	126.8	101	162.8	162	98	112.6	87.6	83.6	110.2	110.2	107.6	100.6	126.2	106	88.6	98.8	110	99.4	100.6	111.2	108	5725	146.79		4776.2	159.21		3413.2	189.62
	128	24	380.4	345	271.8	305.2	267.6	225.2	283	124.2	133.4	199	345.6	174.4	105.8	97.8	104.8	112.6	166.8	298.6	170.8	84.6	93	95.8	99.8	100	96.5	99.2	98.8	100	87.4	98.4	119	94.6	103.6	97	116.2	216.4	330.4	215	231.2	6688.9	171.51		5165.5	172.18		3941.2	218.96
		Average:	199.63	194.18	185.3	163.31	141.14	141.13	125.7	109.45	93.91	92.86	98.83	93.36	97.94	80.32	84.84	75.08	79.34	91.17	79.97	66.83	74.94	64.67	60.36	65.86	61.84	72.27	62.73	67.28	74.39	71.97	68.19	66.34	65.71	70.7	89.28	112.4	107.68	100.81	94.6	3510.43	92.12		2970.57	99.02		2147.48	119.3
		SEM:	15.35	15.75	13.21	12.23	11.47	12.19	14.21	13.64	10.7	13.1	16.18	13.28	13.24	11.08	12.17	12.13	13.26	15.43	10.84	8.64	11.45	8.12	8.69	8.41	6.6	10.26	6.96	7.51	10.59	10.07	8.73	14.16	13.99	13.13	15.01	23.36	24.45	20.5	22.28	262.26	6.81		205.74	6.86		153.37	8.52
Morphine (30 nmol) effects, ICV: RESPIRATION (in saline (0.9%), 5ul i.c.v.) administered 5 min prior to placement in box.																From "Morphine icv DRC controls-ambulations respiration" database.
		Mouse		Average respiration (BPM) - Total for time period																																									With 150-min cut off:			With 90-min cut off:
			Start - 05:00	5:00 - 10:00	10:00 - 15:00	15:00 - 20:00	20:00 - 25:00	25:00 - 30:00	30:00 - 35:00	35:00 - 40:00	40:00 - 45:00	45:00 - 50:00	50:00 - 55:00	55:00 - 60:00	60:00 - 65:00	65:00 - 70:00	70:00 - 75:00	75:00 - 80:00	80:00 - 85:00	85:00 - 90:00	90:00 - 95:00	95:00 - 100:00	100:00 - 105:00	105:00 - 110:00	110:00 - 115:00	115:00 - 120:00	120:00 - 125:00	125:00 - 130:00	130:00 - 135:00	135:00 - 140:00	140:00 - 145:00	145:00 - 150:00	150:00 - 155:00	155:00 - 160:00	160:00 - 165:00	165:00 - 170:00	170:00 - 175:00	175:00 - 180:00	180:00 - 185:00	185:00 - 190:00	190:00 - 195:00	Total BPM:	Average BPM:		Total BPM:	Average BPM::		Total BPM:	Average BPM:
	113	1	170	159	138.6	240.4	226.4	160.6	165.6	144.8	81.6	117.6	204.4	155.2	222.8	123.2	130	63	69.2	85.6	274.2	165.4	160.6	108.6	50	56	51.2	207	73.6	53	55	81.4	54.2	92.6	59	48.8	127.8	119	45.8	67	70.6	4678.8	119.97		3912.6	130.42		2658	147.67
	114	2	234.8	230.8	179.6	113	151.2	138.4	110.6	165.6	208.6	78.4	184.4	98.4	72.6	73	70.6	71.2	63.2	186.6	149.2	40	109.6	147.2	107	40.4	35.2	47.6	39.2	49	49	80	43.6	51.4	46.6	65	35	29.6	44.2	34	43.4	3717.2	95.31		3244.4	108.15		2431	135.06
	115	3	270.8	264.8	189.6	244.4	206.6	232.4	145.6	186.6	64.4	143.8	74.6	170	192.8	63.4	50.2	85.6	301	160	40.6	67.2	41.8	200.4	137.2	46.2	60.2	43.8	41.4	49.8	31.2	36.2	44	33.8	39.8	144.4	282	195	81.6	79.6	182	4924.8	164.16		3842.6	126.88		3046.6	169.26
	116	4	263.2	182.8	149.4	197.2	162.2	135.8	183.8	242.8	170.4	164	101.2	149.4	167	81.6	178	110.4	100.4	113.2	139	95.6	121.4	48	46.8	147.6	53	51.2	71.8	54.8	80.6	248.8	195	152	135.6	131	42.2	35.8	39.2	29.8	36.2	4808.2	160.27		4011.4	133.71		2852.8	158.49
	117	5	278.2	198.2	176	196.4	174.8	155.8	145.8	177.4	157	177	182.2	137.2	137	169.4	244	135	131	134.2	147.2	179.4	187	91.2	100.4	123.2	107	97.6	112.8	98.6	106	110.2	97.8	104.6	105.6	140	204.4	151	91	95	97	5653.6	144.96		4457	148.57		3106.6	172.59
	118	6	306.4	228.6	215.6	192.2	213.8	145.8	130.8	171.4	195.6	145.8	141.2	126.8	191.8	176.6	92.2	178.4	82	153.2	107	134.4	127.4	95	95.6	78.2	97.4	174.8	131.2	65.4	72.2	67.2	61.6	95.4	60.2	58.8	68	62.8	58.6	60.4	71.2	4931	126.44		4334	144.47		3088.2	171.57
	119	7	233.4	160.6	169.2	198.8	160.6	180.2	103.6	102.2	116	208.6	176.6	129.4	111.8	249.6	118.6	120.8	101	98.2	161	175.8	105	153.8	87.8	80.8	54.6	74.8	68.6	54	60	55.2	69.2	47.2	47	52.8	48.8	44.8	43.8	45.6	52.8	4322.6	110.84		3870.6	129.02		2739.2	152.18
	120	8	320.2	243.8	255.8	174.6	193	182.8	201.4	175.2	193.4	133.2	225.4	148.6	105.6	220.2	126.2	210.2	158.2	127.4	132.4	254.8	263.2	197	82.2	229.4	270	241.4	158	117	221.6	227	81	86	81.2	85.8	84	85.8	76.8	73	77.6	6520.4	167.19		5789.2	192.97		3395.2	188.62
	102	9	61	64.6	124.2	107.6	104	101.8	100.8	101	100.2	97.4	100	93.8	101.2	104.8	99.4	93	97.4	97	96.4	88.2	97.4	98	95.8	97.4	94.4	97.2	95.6	98.4	96.4	98.6	100.3	100.4	97.2	101.6	111	96.4	118.4	97	112.8	3838.1	98.41		2903	96.77		1749.2	97.18
	103	10	214.2	215.2	230.2	259.6	213.6	178.8	137.6	187.6	246.2	221	231.2	194	177	104.1	117.8	173	218.2	134.2	115.8	140.6	104	111.6	103.8	74.4	60.6	91.6	182.8	42.8	70.4	83.6	53.8	84.2	71	101.4	77.8	65.4	72.2	113.2	174.6	5449.1	139.72		4635.5	154.52		3453.5	191.86
	104	11	270.4	218.8	205.8	195	200.4	154.8	200.8	199.8	156	138.8	205.4	180.9	180	216	218.2	321.8	220.2	214.4	176.2	206.8	132	224.6	139.4	185.6	133.4	129	35.2	159.6	252	214	155.9	128.2	143	43.4	102.6	104	25.8	37	71.8	6497	166.59		5685.3	189.51		3697.5	205.42
	105	12	190	191.2	168.6	172	183.8	169.8	168.8	148.6	178.6	159.2	198.4	163.5	172.4	155.8	158.4	174.4	159.8	156.8	171	179.4	163	153.6	156.4	163.2	184.4	172.2	166.6	174.8	159	175.8	164.1	241.6	248.2	173.8	158.2	172.4	196	93.8	125.8	6663.4	170.86		5089.5	169.65		3070.1	170.56
	107	13	229.4	251	207.8	177.4	224.6	174.4	164.4	163.4	133.4	125.5	113.8	189.9	194.4	159.4	234.6	218.2	138.6	111	112	222.8	91.2	76.6	69.4	74.6	34.4	57.6	43.2	43.4	38.4	44	102.8	33.3	15.5	10	14	16.8	15.6	13.4	189.8	4530	116.15		4118.8	137.29		3211.2	178.4
	108	14	24.6	23	76.4	90.6	72.8	61.8	67.2	65.2	65.4	67.5	67.8	63.8	71.8	63.5	60.6	72.8	68.4	73.6	73.8	77.6	74	74.4	74.2	78.8	74.8	84.2	78.6	75	76.8	76.6	80.1	85.8	86	84.7	85.8	84.8	80.8	78.6	88.4	2830.6	72.58		2075.6	69.19		1156.8	64.27
	105	15	80.8	71.4	72	77.6	71.4	80	86.2	74.6	81.6	76.2	69.4	72.8	70.4	66	67.8	77.4	80.4	65.4	61	71.8	75.8	75.4	93	92.4	89.4	75.4	89.6	90.8	105	99	91.2	108.2	100.4	97.4	106.9	94.6	87	103.8	88.6	3238.1	83.03		2360	78.67		1341.4	74.52
	106	16	159.6	165	179.6	167.6	160.2	169.2	167.2	168	159.4	183.4	213.6	196	206	211.4	198.2	200.2	198.4	201.6	210.4	211.6	213.4	214.6	207.8	211.2	216.4	213.8	202.9	207.8	201.4	202.6	194.8	212.2	202.2	206.6	206.1	209.2	198.6	184.6	193	7625.8	195.53		5818.5	193.95		3304.6	183.59
	107	17	56.2	93.2	89.2	100	77	71.4	63.2	59	78.8	69.6	57.6	74	63.2	71.6	64.4	69.8	64.6	56.8	68.4	74	71.8	67.6	86.4	75.4	86.4	71.6	88	88.6	76.4	76.6	75.2	79.8	85.4	78.4	81.5	73.4	79.8	95.4	98	2957.7	75.84		2210.8	73.69		1279.6	71.09
	108	18	226.8	305	278.8	194.8	152.4	143	139	128	129	159.8	78.2	69.2	109.8	141.8	34.6	39.8	54.2	77.4	107.8	155	105.2	45	94.8	46.4	54	49.2	62.8	55.6	66	68.2	63.4	55.4	60.8	51	71.5	56.4	86.8	89.6	30	3936.5	100.94		3371.6	112.39		2461.6	136.76
		Average:	199.44	181.5	172.58	172.18	163.82	146.49	137.91	147.84	139.76	137.04	145.86	134.05	141.53	136.19	125.77	134.17	128.12	124.81	130.19	141.13	124.66	121.26	101.56	105.62	97.6	110	96.77	87.69	100.97	113.61	96	99.56	93.59	93.05	105.98	94.29	80.11	77.27	100.2	4840.16	128.27		3985.02	132.77		2669.06	148.28
		SEM:	21.2	17.93	13.59	12.71	12.18	10.3	9.92	11.81	12.71	10.91	14.71	10.74	12.61	14.52	15.53	17.28	16.27	11.05	13.43	14.88	13	13.64	9.12	13.67	15.34	15.05	12.17	11.48	15.2	15.94	11.54	13.2	13.73	11.84	16.14	13.2	11.75	9.26	12.46	319.94	8.7		274.65	9.16		185.53	10.31
Morphine (100 nmol) effects, ICV: RESPIRATION (in saline (0.9%), 5ul i.c.v.) administered 5 min prior to placement in box.
		Mouse		Average respiration (BPM) - Total for time period																																									With 150-min cut off:			With 90-min cut off:
			Start - 05:00	5:00 - 10:00	10:00 - 15:00	15:00 - 20:00	20:00 - 25:00	25:00 - 30:00	30:00 - 35:00	35:00 - 40:00	40:00 - 45:00	45:00 - 50:00	50:00 - 55:00	55:00 - 60:00	60:00 - 65:00	65:00 - 70:00	70:00 - 75:00	75:00 - 80:00	80:00 - 85:00	85:00 - 90:00	90:00 - 95:00	95:00 - 100:00	100:00 - 105:00	105:00 - 110:00	110:00 - 115:00	115:00 - 120:00	120:00 - 125:00	125:00 - 130:00	130:00 - 135:00	135:00 - 140:00	140:00 - 145:00	145:00 - 150:00	150:00 - 155:00	155:00 - 160:00	160:00 - 165:00	165:00 - 170:00	170:00 - 175:00	175:00 - 180:00	180:00 - 185:00	185:00 - 190:00	190:00 - 195:00	Total BPM:	Average BPM:		Total BPM:	Average BPM::		Total BPM:	Average BPM:
	101	1	162	227	181.2	159.2	145.2	141.4	166.4	124.4	129.6	155	142.6	122.8	113.6	112.8	177.4	153.8	136.2	79.6	156	144.6	91.8	91.6	131.8	70.2	120.6	168.8	127.8	47.8	43.8	150.8	79.4	102.6	139.8	132.2	108.2	62.8	31.2	36.6	38	4706.6	120.68		3975.8	132.53		2630.2	146.12
	102	2	266.4	214.8	260.6	227.6	172.2	185.4	205	117.6	201.8	126.8	134.8	124.8	171.8	114.2	149	91.4	101	243.4	83.4	221.6	58.4	201	65.8	85.2	86.4	126.6	161.6	117.6	95.6	174.2	121.8	36.2	46.8	90	37.2	46.2	63.4	33.2	36.2	5097	130.69		4586	152.87		3108.6	172.7
	103	3	177	203.6	163.2	158.6	151.8	144.6	153	161.4	161.8	153.8	163.4	185	185.4	169	159	168.8	167.8	175.2	178.6	145.8	154.8	187	173	167.6	144	174.6	192	152.8	251.6	173.8	128	103.6	160.8	211.6	187	166	146	138	93.8	6432.8	164.94		5098	169.93		3002.4	166.8
	104	4	215.6	206.8	174.8	170.2	167.8	159.4	166.4	170.4	184.2	134.6	161.2	168.6	138	154.8	156.6	157.2	154.8	218.4	118.2	150.4	113	130.2	201.8	293.6	306.8	165	112	114.4	171	144.4	141.2	123.2	132.4	312.4	204.4	164	68.2	98.8	75	6400.2	164.11		5080.6	169.35		3059.8	169.99
	105	5	206.2	180.8	151.4	143.8	148.8	147	163.8	149.2	154	155.8	138.2	154.6	152.2	163	147.8	171.6	125.6	155.6	118.6	128.4	173.6	149.2	100.2	145.6	123.4	147.2	155.6	103.2	139.4	125.2	151.2	78.8	79	161	84	95.8	168	31.6	38	5306.4	136.06		4419	147.3		2809.4	156.08
	106	6	103	165.8	145.4	93.2	93	98.4	97	109.2	91.2	106.6	110	100.4	98.2	82.6	139.8	109.6	128	109.2	81.6	70.6	131	117.2	81.6	98.8	58.4	96.4	93.4	108.4	109.8	47	58.2	51.4	42.8	139	252.6	128	64	26.2	20.8	3857.8	98.92		3074.8	102.49		1980.6	110.03
	107	7	171.6	133.2	131.6	205.2	123.6	95	149.4	122.2	127.8	125.2	76.4	127.4	130	119.8	131.2	67.4	49.4	155.4	58.8	64.6	142.4	139	44.8	46.8	45.2	146.8	78	32.4	118.6	87.2	32.8	51.4	36	51	41.8	57	40.4	56	19	3631.8	93.12		3246.4	108.21		2241.8	124.54
	108	8	85.8	115	182	153.2	135.2	146.8	146	141.2	147.4	134.2	140.4	147.8	130	145.8	149.4	140.4	119	115.2	127.4	146	120.2	88.8	150.6	75.4	125.4	74.2	91.8	115.4	83.4	237.6	109	52	114.8	86.2	87	58.4	43.6	63	54.4	4579.4	117.42		3911	130.37		2474.8	137.49
	112	9	122.3	146.6	157.2	151.6	123.8	56	69.8	85.4	120	136	138.9	132.2	123.4	128.9	117.6	109.8	108.2	107.8	103.8	107.2	106.6	99.8	99	99.8	105.2	99.6	98.6	99.2	112.2	100.4	96.2	88.4	93.2	91	86.8	86	91.5	95.6	90.2	4185.8	107.33		3366.9	112.23		2135.5	118.64
	113	10	136.4	242.8	261.6	204.2	210	192.4	198.6	207.4	201.4	192.6	199.8	188.8	202.6	203	181.2	195.6	207.6	212.6	205.8	191.4	202.8	251	231.6	197.6	207.4	228.4	268.6	217.6	174.2	230.8	237.6	235.6	262.1	225.7	229.2	238.8	155	163.6	189.4	8182.8	209.82		6245.8	208.19		3638.6	202.14
	114	11	74.8	148.4	165.8	136	68.8	72	97	110	135.6	134.2	156.8	125.4	120	106	136.4	155.4	139.4	95.2	82	82.8	66.2	98.2	94	90	77	80.8	85.8	81.2	79.4	66	88.4	68.1	62	74.6	75.4	77.4	62.9	62.8	105.4	3837.6	98.4		3160.6	105.35		2177.2	120.96
	115	12	55.8	249.2	241.8	260.4	217	227	222.2	209.4	186.6	196.2	196	212.2	204	190.1	220.9	189.8	191.6	209.6	189.8	207.6	211	185.2	224.8	210.2	221.8	191.2	203	240	183	193.8	188.8	181.2	221.9	200.7	206.3	188.4	187.7	204	189.8	7910	202.82		6141.2	204.71		3679.8	204.43
	112	13	75.4	35.6	44.2	64.2	108.6	137.8	148.2	139.4	122.6	112	111.4	105.2	114.4	106.8	98	93.5	102	94.8	104	97.6	85.2	82	89.4	81.6	94.3	95.4	86.4	88.6	88.6	98.2	106.4	96.4	104	105.8	91.1	104.2	88.6	104.2	108.6	3814.7	97.81		2905.4	96.85		1814.1	100.78
	113	14	39.6	29	21	50.6	68.6	96.4	93.2	88	75	77.2	81	80.8	76.2	77.6	71.6	65.9	61.4	68	77.8	78	71.4	72	63.2	65.4	67.2	80.4	63	67.2	56.8	71.2	74.2	74.6	66.6	70.4	74.4	69.4	69.2	65	73.8	2692.3	69.03		2054.7	68.49		1221.1	67.84
	114	15	56.2	26.4	49.4	147	157.6	147.4	128.4	115	107.4	96	94.6	99	82.2	76.8	89.6	83.7	79.4	75.4	81	79.2	84	84.6	63	66	78.3	73.2	72.2	79	78.6	81.6	82.4	84.8	76.6	75	91	83.4	97.6	92.6	90.4	3406	87.33		2632.2	87.74		1711.5	95.08
	115	16	102.6	124	98.6	114.2	142.4	149.6	157	124.2	97.6	69.8	87.6	82.2	89.8	84.8	95	88.6	80.6	90.2	84.6	87.2	89.6	95.2	86.4	83.6	83.6	84.6	91.4	86.4	89.8	87	91.4	81.2	95	101.2	88.8	92.6	100.4	101.8	107.6	3788.2	97.13		2928.2	97.61		1878.8	104.38
		Average:	128.17	153.06	151.86	152.45	139.65	137.29	147.59	135.9	140.25	131.63	133.32	134.83	133.24	127.25	138.78	127.66	122	137.85	115.71	125.19	118.88	129.5	118.81	117.34	121.56	127.08	123.83	109.45	117.24	129.33	111.69	94.34	108.36	132.99	121.58	107.4	92.36	85.81	83.15	4864.34	124.73		3926.66	130.89		2472.76	137.38
		SEM:	16.5	18.36	17.92	13.95	10.63	11.23	10.62	9.14	9.77	8.82	9.44	9.69	10.09	9.98	9.59	10.92	11.07	14.54	11.14	12.53	11.78	13.01	15.01	16.91	17.39	12.1	14.35	13.71	13.58	14.82	12.62	12.74	15.86	17.95	17.3	13.74	11.93	12.53	12.89	401.11	10.29		309.4	10.31		175.75	9.76
Morphine (30 mg/kg ip) effects: Morphine (30 mg/kg, i.p, in 0.9% saline) administered 5 min prior to placement in box.
		Mouse		Average respiration (BPM) - Total for time period																																									With 150-min cut off:			With 90-min cut off:
			Start - 05:00	5:00 - 10:00	10:00 - 15:00	15:00 - 20:00	20:00 - 25:00	25:00 - 30:00	30:00 - 35:00	35:00 - 40:00	40:00 - 45:00	45:00 - 50:00	50:00 - 55:00	55:00 - 60:00	60:00 - 65:00	65:00 - 70:00	70:00 - 75:00	75:00 - 80:00	80:00 - 85:00	85:00 - 90:00	90:00 - 95:00	95:00 - 100:00	100:00 - 105:00	105:00 - 110:00	110:00 - 115:00	115:00 - 120:00	120:00 - 125:00	125:00 - 130:00	130:00 - 135:00	135:00 - 140:00	140:00 - 145:00	145:00 - 150:00	150:00 - 155:00	155:00 - 160:00	160:00 - 165:00	165:00 - 170:00	170:00 - 175:00	175:00 - 180:00	180:00 - 185:00	185:00 - 190:00	190:00 - 195:00	Total BPM:	Average BPM:		Total BPM:	Average BPM::		Total BPM:	Average BPM:
		1	111.7	77.2	76.8	95.8	94.4	104.6	88.4	102.4	101.8	98.4	100	93	86.6	85.4	93.4	90	91.1	101.9	84.6	71.2	105.2	107	97	87.8	84	87.8	94.6	98	102.8	92										2804.9	77.91		2804.9	93.5		1692.9	94.05
		2	91.4	66.3	55.2	63	69.2	66.8	68.8	62	70.8	59.4	66.8	75.4	66.6	73.4	68.4	67.6	69.4	70.2	75.2	78.4	71.6	72.4	83.2	76.2	90.6	94.4	93.3	84.8	98.4	82.6										2231.8	61.99		2231.8	74.39		1230.7	68.37
		3	175.6	74.5	79	89.6	92.4	104.5	109.4	93.6	92.8	94	90	82	80.6	106	98.2	99.8	93.3	90.5	89.8	75.8	110.8	100.4	113.4	71.2	93.2	97	101.9	107.6	111	101.4										2919.3	81.09		2919.3	97.31		1745.8	96.99
		4	180.6	81.7	80.6	77.4	84.2	95.2	94.6	94	88.8	90.2	84.2	87.4	92	93.6	88.8	84.4	88.9	90.9	81.2	89.6	91	77.6	84.2	76.8	84.6	80.8	95	90.2	98	109.6										2736.1	76		2736.1	91.2		1677.5	93.19
		5	104.5	90	87.6	91.8	87	88.4	94.4	90.2	89.2	88.8	85.8	86.6	86.2	86	89.2	90.9	90.6	86.6	86.8	93.7	114.7	104.8	110.3	108.2	109.8	101	110.6	101.6	110.2	130.2										2895.7	80.44		2895.7	96.52		1613.8	89.66
		6	100.9	74.8	71.4	83.4	91.7	94.2	88.2	90.9	88.8	89.8	79	79.6	76.2	76	80.8	79.8	75.2	74.4	79	78.2	83.9	81.4	82.8	87.8	84.8	85.2	105.6	98.4	96.6	86.4										2545.2	70.7		2545.2	84.84		1495.1	83.06
		7	108.1	98	95.6	100.1	111.4	102.6	105.4	103.3	94.6	101.8	98.6	97.6	93.2	98.2	97.6	97.4	99.2	102.4	95.7	101.5	95.7	101.8	107.2	111.8	103.2	117.4	141.8	120.6	121.4	147.8										3171	88.08		3171	105.7		1805.1	100.28
		8	72.4	63.4	68.6	74.3	86.8	77.8	82.7	89	87.6	86	76.4	85.6	83.6	82.4	83.8	99.6	77.6	93.2	88	86.3	80.9	89.6	96.2	91.1	85.6	85.8	85.1	84	94.6	84.8										2522.8	70.08		2522.8	84.09		1470.8	81.71
		9	103.8	62.2	47.8	46.8	43	58.8	55.4	54	61.4	59	62.4	65.8	59	52.4	57.4	56	59	57	54	59.8	55.2	55.8	55.8	60.2	53.6	61.8	59.8	78.8	96.2	103										1855.2	51.53		1855.2	61.84		1061.2	58.96
		10	137.6	59.2	55.4	49	49.2	52.2	61	53.8	61	64	71.4	62.8	60.8	80.2	79	78.2	75.6	82.6	79.8	90.6	67.2	86.6	87.4	89.6	97	94.8	81	84.4	92.6	99.8										2283.8	63.44		2283.8	76.13		1233	68.5
		11	102.4	70	70.2	74.8	73.4	73.2	71.6	64.4	63.2	61.6	59.4	58.6	60.4	67.8	65	60.4	69	70.6	70.2	81.4	67.6	64	69	61.8	71.2	64.4	68	65.8	67	67.8										2054.2	57.06		2054.2	68.47		1236	68.67
		12	180.4	84.6	66.4	66.6	75.2	70.2	82	80.2	85.8	79	80	88.6	89.4	92.8	88.4	84.8	92.2	87	90.6	99.8	96.4	99.4	97.4	96.8	94.6	95.8	97.2	90.4	99	102.6										2733.6	91.12		2733.6	91.12		1573.6	87.42
		Average:	122.45	75.16	71.22	76.05	79.83	82.38	83.49	81.48	82.15	81	79.5	80.25	77.88	82.85	82.5	82.41	81.76	83.94	81.24	83.86	86.68	86.73	90.33	84.94	87.68	88.85	94.49	92.05	98.98	100.67										2562.8	72.45		2562.8	85.43		1486.29	82.57
		SEM:	10.7	3.42	4.02	5.01	5.57	5.29	4.84	5.25	4.08	4.58	3.78	3.55	3.73	4.17	3.76	4.25	3.58	3.93	3.22	3.5	5.44	4.85	4.88	4.73	4.24	4.41	6.07	4.15	3.78	6.23										112.62	3.53		112.62	3.75		69.92	3.88
U50,488 (30 nmol, i.c.v.): RESPIRATION (in Saline (0.9%), i.c.v.) administered 5 min prior to placement in box.
		Mouse		Average respiration (BPM) - Total for time period																																									With 150-min cut off:			With 90-min cut off:
			Start - 05:00	5:00 - 10:00	10:00 - 15:00	15:00 - 20:00	20:00 - 25:00	25:00 - 30:00	30:00 - 35:00	35:00 - 40:00	40:00 - 45:00	45:00 - 50:00	50:00 - 55:00	55:00 - 60:00	60:00 - 65:00	65:00 - 70:00	70:00 - 75:00	75:00 - 80:00	80:00 - 85:00	85:00 - 90:00	90:00 - 95:00	95:00 - 100:00	100:00 - 105:00	105:00 - 110:00	110:00 - 115:00	115:00 - 120:00	120:00 - 125:00	125:00 - 130:00	130:00 - 135:00	135:00 - 140:00	140:00 - 145:00	145:00 - 150:00	150:00 - 155:00	155:00 - 160:00	160:00 - 165:00	165:00 - 170:00	170:00 - 175:00	175:00 - 180:00	180:00 - 185:00	185:00 - 190:00	190:00 - 195:00	Total XAMB:	Average XAMB per 5 min:		Total XAMB:	Average XAMB per 5 min:		Total XAMB:	Average XAMB per 5 min:
	105	1	183.8	167.4	178.3	162.2	128.2	133.6	71.5	66.2	86.8	21.6	26.8	68.4	28.8	24	15.6	8.8	15.4	8	6.8	12.4	6.6	6.4	12.9	5.2	11.6	12.6	8.6	9.4	24.2	20.6	14.8	20.4	34.6	13.8	7.2	54.4	61.6	47.4	25.6	1812.5	50.35		1532.7	51.09		1395.4	77.52
	106	2	14	194.8	251.4	198.8	202.6	176.8	194.1	105.6	97	84.4	93.2	88	71	24.2	20.2	11.4	13	58.4	25.6	9.6	57	20.4	34.5	25.7	17.6	38.4	7	6.6	7.4	7.6	7.2	13	7.4	27.5	20.6	15	6	4.6	14.3	2271.9	63.11		2156.3	71.88		1898.9	105.49
	107	3	157.4	156.4	239.5	184.2	163.2	163.8	99.3	118.6	98	148.8	179.2	116	95.8	113.2	10.6	5	15.6	15.4	13.4	4.6	3	11.8	6.6	7.8	46.8	6.8	15.8	10.3	13.2	14.6	22.6	40	14.2	45.7	19.6	50.8	12.2	5.6	21.6	2467	68.53		2234.7	74.49		2080	115.56
	108	4	52.2	160.6	242.8	241.4	195.2	138.2	156.5	191.8	178.4	140.2	179	159.6	93.4	71.8	55.4	58	56.2	36	42.2	64.6	29.2	20.8	11.2	28.9	13.4	46.8	129.4	160.8	19.6	40.4	28.8	13.8	16.8	77.8	105.4	7.6	13	10.2	5.8	3293.2	91.48		3014	100.47		2406.7	133.71
	109	5	111	261	280.9	268	248.6	252.8	227.3	169.8	177.4	184.4	197.2	192	168.8	186	189.4	212.4	209.4	168	97.8	161	171	162.8	107.8	227.4	186.4	146.6	166.4	188	153.6	171.8	215.8	238.4	201.4	180.7	230.8	218.4	200.6	157.6	217.6	7506.3	208.51		5645	188.17		3704.4	205.8
	110	6	65.4	160.4	212.4	262	272.8	237.4	170.2	165.6	199.8	133.4	127	140.4	154.8	188.2	173	163.6	183.2	174.2	202.8	193.2	131.8	140.6	139.6	130.1	173	166.6	149.8	118.9	193	180.6	194	136.4	150.4	145.3	167	176.4	181.4	164.8	154.9	6574.4	219.15		5103.8	170.13		3183.8	176.88
	111	7	49	169.6	323.1	300.4	274.4	264.6	293.1	229.6	213.2	177.8	175.8	160.4	184.8	157.6	179	200.4	171	165.4	147.6	132	169.2	163	174.2	200.2	173.2	171.8	179.4	187.6	212.2	202.4	224	240.8	238.2	201.5	189.8	173.6	195	211.2	192.3	7668.4	255.61		5802	193.4		3689.2	204.96
	112	8	174.8	171.2	266.8	255	268.4	247.4	238	236.4	248.8	197.6	145.6	187.8	169.2	169.4	180.8	168.4	200	175	152.2	188.2	197.6	226.8	223.3	233.4	224.4	220.4	207.8	223.6	224.6	238.6	212.2	197.6	219.6	234.2	218.2	234	209	240.4	238.5	8265.2	275.51		6261.5	208.72		3700.6	205.59
	113	9	127.8	200.8	259.3	257.6	281.6	253.2	260	260	254	238.4	238	234	188.8	235	227.2	226.4	205	185.6	164.6	173.4	154.6	160.6	181.7	190.2	176.2	203.6	214.4	220.8	230.2	219.2	213	226	222.6	221.7	194.6	213	220	208	199.5	8340.6	278.02		6422.2	214.07		4132.7	229.59
	114	10	92.8	316	302.2	304	285	289.4	260.6	228.6	234.6	200.2	221.4	202.4	203.4	174.2	232.8	216.8	204	223.8	258	256.4	206.6	236.6	193.8	262.8	262.6	234.6	224.4	227.4	241	232.6	246.6	244.6	252.8	248.3	254.2	261.2	258.6	196.4	203.2	9194.9	306.5		7029	234.3		4192.2	232.9
	115	11	40.2	35.8	90	173.2	265.4	259.4	243.3	197.2	240	179.2	138.4	154.2	147.6	179.4	197.8	199.8	160	140.8	163.8	195.6	186.6	161	124.4	162.5	112.8	113.8	145.8	167.2	206.4	198.8	201.6	183.8	178.4	182.9	202.6	201.2	167.8	142.6	146.6	6587.9	219.6		4980.4	166.01		3041.7	168.98
	116	12	40	98.4	157.6	278.4	279.8	285	211.5	232	182.6	149.2	167	175.2	191	206.8	186	180	165.6	120.2	92.8	67	133.2	156.6	191.5	185.1	206	209.4	183.6	211.6	204	200.2	152.8	151.2	179.2	207.6	213.6	156.8	152.8	171.8	185	6918.1	230.6		5347.3	178.24		3306.3	183.68
	101	13	319.2	314.4	287.4	259.4	193.2	189	199.6	144.8	137.8	139	145.8	186	92.8	140.8	165.6	173.4	177.2	131	132.8	100.6	77	97.2	248.8	155	137.4	77.4	97.6	30.8	42.6	42.8	53.6	48	34.8	36.8	108.2	88.2	31.4	28.4	32.6	5098.4	169.95		4636.4	154.55		3396.4	188.69
	102	14	309.4	242	226.4	256.4	267.6	201.6	149.2	159.8	153.8	143.4	157.4	132.6	76.4	143.6	242.8	174.2	155.6	37.2	16.6	24.2	69.8	34.8	30.2	47.4	53.8	49.8	61	62.6	40.2	67.8	37.8	23.4	35	168.7	44.4	5.2	7.6	11.8	26.6	4148.1	138.27		3787.6	126.25		3229.4	179.41
	103	15	293.2	270.2	328.6	298	236.8	285	205.2	207.6	205	274.6	270.2	260	190.8	250.2	253	140.8	330.7	240.8	197.8	90.6	235.6	229.6	106.8	145.6	178.8	175.6	162.6	139	159.4	160.8	172.4	184.2	162.6	183.4	195.4	171.2	149	145.8	155	8041.9	268.06		6522.9	217.43		4540.7	252.26
	104	16	240.6	200.2	271.4	135	197.4	164.6	112.4	211.6	228.8	205	153	91.2	76.8	84	159.6	75.8	98.7	63.8	73.4	95	56.2	41.8	82.6	106.4	147.2	151.8	86	158.6	142	114.4	161.4	162.4	221.6	54.6	137	151.8	131.8	131.4	118	5295.3	176.51		4025.3	134.18		2769.9	153.88
	105	17	228.4	237.8	227.2	217.4	218	190.8	165.8	175	179.6	167.4	144.8	114.6	136.8	169	115.6	31.6	53.6	95.8	86	84.6	83.2	43.8	9.6	6.6	8.8	5.4	6	7.8	4.2	7.6	9.4	14.2	12.6	9.1	12.6	13.8	8.4	12	13.2	3328.1	110.94		3222.8	107.43		2869.2	159.4
	106	18	177.4	208.2	238	223	243.2	203.6	212	198.4	190	228	175	59.2	167.8	132.6	25.6	9.6	6.4	4.4	9.4	24.6	8	5.4	9.8	8.8	9.4	91.6	81.2	4	23.6	49	107.8	160.4	13.2	7.4	54.8	43	1.2	3	3.6	3421.6	114.05		3027.2	100.91		2702.4	150.13
	107	19	276	281.4	261.8	239.4	188.2	211.6	187.2	171.2	90.6	109.4	172.6	142.8	134.6	154.4	166.8	223.8	121.7	74.8	36.6	46.4	33	255.2	153	11	15.6	34.8	43	27.2	14	30.8	134.4	254.4	128.2	12.4	3.4	11.4	18.8	14.6	23.6	4510.1	150.34		3908.9	130.3		3208.3	178.24
	108	20	225.6	274.2	278.2	272.2	258.8	226	219	181.2	167.6	191	149.2	168.8	179	168.2	124.2	232.6	164.6	137.8	188.2	153.8	89.8	146	120.6	18	41.6	30.2	55.4	59.6	16	24	13.4	147.8	153.2	98.4	76.2	20	33.6	29.2	6.8	5140	171.33		4561.4	152.05		3618.2	201.01
		Average:	158.91	206.04	246.17	239.3	233.42	218.69	193.79	182.55	178.19	165.65	162.83	151.68	137.62	148.63	146.05	135.64	135.35	112.82	105.42	103.89	104.95	116.06	108.15	107.91	109.83	109.4	111.26	111.09	108.57	111.23	121.18	135.04	123.84	117.89	122.78	113.35	102.99	96.84	99.22	5494.2	178.32		4461.07	148.7		3153.32	175.18
		SEM:	22.14	15.81	12.58	10.66	10.05	10.86	12.67	10.74	11.95	12.58	11.38	11.77	11.39	13.55	17.8	19.05	19.21	16.24	17.15	16.6	16.46	19.31	17.83	20.34	19.15	17.62	16.62	19.25	20.97	19.6	19.7	20.09	20.44	19.47	19.47	20.13	20.25	19.3	19.67	510.85	17.57		355.84	11.86		177.55	9.86
		T-test to matching saline (0.9%) i.c.v.:	2.82792e-05	0.00557025	0.623731	0.316975	0.586399	0.908159	0.79148	0.46908	0.161269	0.543302	0.559392	0.263487	0.712679	0.99681	0.767786	0.330484	0.548438	0.434071	0.0946298	0.106837	0.20826	0.486454	0.160836	0.144751	0.318521	0.346674	0.269257	0.350939	0.560179	0.993279	0.569791	0.998934	0.356902	0.434728	0.850913	0.00501483	0.0141496	0.072239	0.0952157	0.306233	0.64879		0.212364	0.212369		0.255035	0.255013
U50,488 (100 nmol, i.c.v.): RESPIRATION (in Saline (0.9%), i.c.v.) administered 5 min prior to placement in box.														TJC/SE testing; new at UF
		Mouse		Average respiration (BPM) - Total for time period																																									With 150-min cut off:			With 90-min cut off:
			Start - 05:00	5:00 - 10:00	10:00 - 15:00	15:00 - 20:00	20:00 - 25:00	25:00 - 30:00	30:00 - 35:00	35:00 - 40:00	40:00 - 45:00	45:00 - 50:00	50:00 - 55:00	55:00 - 60:00	60:00 - 65:00	65:00 - 70:00	70:00 - 75:00	75:00 - 80:00	80:00 - 85:00	85:00 - 90:00	90:00 - 95:00	95:00 - 100:00	100:00 - 105:00	105:00 - 110:00	110:00 - 115:00	115:00 - 120:00	120:00 - 125:00	125:00 - 130:00	130:00 - 135:00	135:00 - 140:00	140:00 - 145:00	145:00 - 150:00	150:00 - 155:00	155:00 - 160:00	160:00 - 165:00	165:00 - 170:00	170:00 - 175:00	175:00 - 180:00	180:00 - 185:00	185:00 - 190:00	190:00 - 195:00	Total BPM:	Average BPM:		Total BPM:	Average BPM::		Total BPM:	Average BPM:
	109	1	129.8	114.2	125.2	131.2	145.8	175.2	144.8	138.6	148.4	117.2	139.2	96.4	95.4	109.6	108.4	117.6	134	179.8	92.4	101.4	117.2	115.6	97.8	107	118	125.2	89.8	99.8	96.2	105.4	95.8	105	106.8	109.8	131.2	156	157.4	139.6	112	4730.2	131.39		3616.6	120.55		2350.8	130.6
	110	2	174.8	157	164.2	204.4	160	198.6	196.6	114.6	98.6	114.5	96.8	114	104.2	103	106.2	125.4	203.8	245	185.2	188.6	130.4	102.6	132.2	82.2	92.8	117.8	147.7	155.6	119	79	97.4	88.2	105.2	142	145.4	228.8	149.2	133.8	148	5452.8	151.47		4214.8	140.49		2681.7	148.98
	111	3	169.2	196	124.2	236.6	262.8	232.6	170.2	190.2	238.4	261.2	232.8	192.4	163.8	156.8	176.2	169.4	181.6	193.6	195.4	217.2	135.8	152.8	165.4	178.4	204.6	184	176.6	165.4	172.2	171.8	190.4	177.6	187	215	252.6	188.6	219.4	203.2	100.2	7401.6	205.6		5667.6	188.92		3548	197.11
	112	4	171.2	106.8	249.8	262.8	254.2	225.6	221	240.8	242.4	184.6	225	189.2	177.4	200.8	177.8	284.6	250.4	160.4	162.6	182	180.8	179	181.2	212.4	191	228.8	215.3	216.2	193.6	200	226.6	220.4	213.8	204.4	263.2	275	227.6	197	162.8	8158.5	226.63		6167.7	205.59		3824.8	212.49
	113	5	163	135.4	186.8	266.4	243.8	242	282.4	215.4	231.6	222.3	215.2	215	182.6	200	208.8	210.8	224.4	227.4	236.2	228.4	232.2	202.2	193.8	169.6	171	245.2	237.6	174.2	156.6	192.2	169.4	191.6	196.2	190.8	185.6	185.2	174.4	161.4	138.4	7905.5	219.6		6312.5	210.42		3873.3	215.18
	114	6	186.6	111.4	204.2	252.6	222	228.4	237	149	154.6	178.8	241	220.8	94.6	118.8	117.4	111	128.4	122.4	148.6	110.6	163.8	129	126.4	132.8	127	151	128.2	137.4	163	214.6	137.6	170.4	189.4	156.8	105.2	146.6	153.4	104.2	117.6	6092.6	203.09		4811.4	160.38		3079	171.06
	115	7	161.2	198.6	242.4	228.6	242	201.6	150	218.2	142.2	103.5	114	246.8	198.2	71.4	98.2	111.2	92.2	222.2	236	82.4	82.2	126.4	115.8	228.8	70.2	101.2	125.2	145.4	118.4	123.6	170	194	161.6	104.2	91.6	158.2	173.6	157.2	188	5996.5	199.88		4598.1	153.27		3042.5	169.03
	116	8	103	175.6	270.4	266.8	251.6	270.2	277.8	232.4	203.6	195.3	215.6	213.6	191.8	198.2	201.2	197.6	167.6	200.8	203	167.8	154.2	206.8	251	220	182.8	202.4	184.5	195.4	163.6	153.2	187	192.4	202.6	201.4	167.4	179.2	150.8	203.8	212	7814.4	260.48		6117.8	203.93		3833.1	212.95
	101	9	202.4	232.6	266.2	250.6	232.6	228.4	219	226.8	217.4	213.6	212	196.8	180.4	177.8	149.8	157	99.8	86.6	91.6	126.8	141	162.6	113.1	135.8	179	162.8	170	162.4	184.4	183	168.2	169.6	146.8	118.5	97.8	158	141	124.8	155.7	6642.7	221.42		5362.3	178.74		3549.8	197.21
	102	10	258.4	269.4	247.2	253.8	231	208.4	182	204.8	207.6	199.6	163.2	157	194.6	196	179.2	148	98.6	35.8	92.6	50.4	65.2	126.8	75.6	47.7	66	81.6	67.8	125.1	164.6	45	43	159.8	88	107.1	85	151	154.2	96.6	51	5378.7	179.29		4443	148.1		3434.6	190.81
	103	11	235.8	237.2	212	224.2	234.4	200.6	196.6	216.6	216.4	217.4	206.6	186	123.6	99	130.2	106.6	108.8	63.2	47.2	40.8	37.8	45.8	27.2	32.6	50.4	26	48.6	38.4	54	47	42	58.2	62.8	43.4	90	73.4	40	65	46	4231.8	141.06		3711	123.7		3215.2	178.62
	104	12	189.4	222.2	238	220	199.8	166.4	143.4	176.4	182.2	167	139.8	86	81.4	114.6	104.2	115.2	41.2	58	92.4	17.2	25.4	31.8	33.1	30.9	27.8	15.8	22.6	22	28.4	34.2	25.4	15.2	25.6	22.2	27.8	25.2	20	11.6	24.5	3224.3	107.48		3026.8	100.89		2645.2	146.96
		Average:	178.73	179.7	210.88	233.17	223.33	214.83	201.73	193.65	190.28	181.25	183.43	176.17	149	145.5	146.47	154.53	144.23	149.6	148.6	126.13	122.17	131.78	126.05	131.52	123.38	136.82	134.49	136.44	134.5	129.08	129.4	145.2	140.48	134.63	136.9	160.43	146.75	133.18	121.35	6085.8	187.28		4837.47	161.25		3256.5	180.92
		SEM:	12.06	15.89	14.78	10.92	10.63	8.35	13.75	11.72	13.04	13.98	14.43	14.97	13.06	13.75	11.72	15.58	17.88	21.24	18.46	20.44	17.46	15.76	18.84	20.87	17.76	21.2	19.33	16.83	15.12	18.98	19.34	18.31	17.78	18.05	20.25	18.61	17.63	16.75	16.77	452.34	13.15		316.09	10.54		146.73	8.15
MP-1207 (30 nmol, i.c.v.): RESPIRATION (in 50% DMSO/50% Saline (0.9%), 5ul i.c.v.) administered 5 min prior to placement in box.
Date:		Mouse		Average respiration (BPM) - Total for time period																																									With 150-min cut off:			With 90-min cut off:
			Start - 05:00	5:00 - 10:00	10:00 - 15:00	15:00 - 20:00	20:00 - 25:00	25:00 - 30:00	30:00 - 35:00	35:00 - 40:00	40:00 - 45:00	45:00 - 50:00	50:00 - 55:00	55:00 - 60:00	60:00 - 65:00	65:00 - 70:00	70:00 - 75:00	75:00 - 80:00	80:00 - 85:00	85:00 - 90:00	90:00 - 95:00	95:00 - 100:00	100:00 - 105:00	105:00 - 110:00	110:00 - 115:00	115:00 - 120:00	120:00 - 125:00	125:00 - 130:00	130:00 - 135:00	135:00 - 140:00	140:00 - 145:00	145:00 - 150:00	150:00 - 155:00	155:00 - 160:00	160:00 - 165:00	165:00 - 170:00	170:00 - 175:00	175:00 - 180:00	180:00 - 185:00	185:00 - 190:00	190:00 - 195:00	Total BPM:	Average BPM:		Total BPM:	Average BPM::		Total BPM:	Average BPM:
2018-10-25	101	1	71.6	61.6	141	248.2	278	267.2	182.8	180.8	170.6	177.8	147	191.6	163.8	84.6	176.2	172	85.6	150.6	168.6	93.4	113	134.4	187.6	84.2	149.2	162	175.3	168.8	161	174.6	217.4	112.2	61.8	111.2	142	71.4	87.8	86.2	82.8	5695.9	146.05		4723.1	157.44		2951	163.94
2018-10-25	102	2	57.8	54	148.8	243	211.4	225.6	158.4	157	162.6	184.4	105.8	152.2	154	116.8	115	96.2	71.8	74.6	156.9	64.8	99.4	118.8	56.6	85.6	161.4	168.4	87.1	40.8	59.4	58.6	181.6	139.2	47	128.4	46.4	66.2	57.2	52	140.2	4505.4	115.52		3647.2	121.57		2489.4	138.3
2018-10-25	103	3	194	282.8	279	228.4	246	198	269.3	229.6	105.6	109.8	163.6	108.6	122.8	136.4	170.2	253	200.4	161.1	95	63.2	46	38.2	73.6	88.6	66.6	56.8	31.3	65	57.2	49.4	38.6	76.4	252.4	205	142.4	120	133.2	42.2	16.8	5216.5	133.76		4189.5	139.65		3458.6	192.14
2018-10-25	104	4	85.4	257.6	218.8	246	159.2	232.2	146.4	180	145.8	135.8	138.4	74.2	191.2	172.4	53	53.8	67	105.7	170.1	89.6	61	67.6	198.4	52	142	79.2	72.7	83.6	92.8	195.6	199.6	138.4	129	124.4	118	45.8	63.2	42.8	40.8	4869.5	124.86		3967.5	132.25		2662.9	147.94
2018-10-25	105	5	111.6	164.6	148	184.2	145.6	120.4	119.2	62	99.8	138	83.6	50.2	60.8	58.8	59.2	102.4	74.6	56.6	63.8	57	52.8	43.2	50.2	56	102	71	120.1	66.6	61.8	71	72.8	72	58.2	47.2	61.4	69	140.8	140.2	89.2	3405.9	87.33		2655.1	88.5		1839.6	102.2
2018-10-25	106	6	93.4	48.8	25	67	115.4	157.6	167.1	99.6	88	82.4	65.8	64.4	95.6	69.2	83.8	77.6	116.8	59.5	155.4	213	71.8	163.2	83.6	137.4	136	131	67.4	155	161.4	62.8	117.8	207	85.6	48.6	56	194	256.2	173.8	145.4	4399.4	112.81		3115	103.83		1577	87.61
2018-10-25	107	7	133.2	249.2	235.6	240.2	231.2	148	146.6	145.2	133.2	120.8	60.8	139	153	198	114.2	110.6	55.2	74.9	76.6	64.8	94.4	76	60	63.2	105.6	69.4	122	177	126.2	155.6	88	42	57.4	59.4	73.6	109.2	112.2	99	91.4	4611.9	118.25		3879.7	129.32		2688.9	149.38
2018-10-25	108	8	98.4	207.8	261.2	201.8	227.6	226.2	196.9	94.8	71.8	83.2	73.4	181.4	195.4	133.2	47.4	56	53.8	53.1	55.7	47	73.4	54.2	102.4	66.8	69.4	66.8	72.3	142.6	134.6	26.2	29.4	22.8	22.4	49	63.8	42.8	36	31.2	17.6	3689.8	94.61		3374.8	112.49		2463.4	136.86
2018-10-25	109	9	83.4	226.8	237.4	279.4	244	198.4	178.3	120.6	137.6	217.2	182.8	240.4	178.8	67.2	208.4	129	90.2	131.8	166.6	189.2	165.8	89	136	226.6	172	182.8	136.3	105	69.6	185.2	128.8	93.4	113.6	96.6	142.6	227	176	128	121	6202.8	159.05		4975.8	165.86		3151.7	175.09
2018-10-25	110	10	91.8	185.8	294.2	288	271.4	195	232.7	238.6	270	238.4	228.2	190	131.2	241.8	247.2	257	235.6	204.3	228.7	220.2	203.2	227.2	194.6	243.4	198.2	163.8	139.3	212.4	213	186.8	181.4	110.4	130.8	165.4	169.4	190	224.6	178.4	184.2	8006.6	205.3		6472	215.73		4041.2	224.51
2019-06-12	106	11	66.6	35.1	33.1	52.4	67.6	73.8	73.4	100.8	60.6	113.6	52.6	63	58	67	64.2	45.1	86.8	39.9	41.3	34.8	41.4	43.1	36.2	36.4	35.4	40.1	38.6	22.8	23.2	28	24	33	30.8	31.6	29.8	35	40	38.2	34.8	1872.1	48		1574.9	52.5		1153.6	64.09
2019-06-12	107	12	96.6	73.7	24.6	22.7	28.6	35.8	145.7	117.8	67.2	101	156.4	71	83.6	41.7	62.6	67	53.2	53.4	109	123.6	105.4	106.2	118.8	103	91.4	50	47	126.6	66.1	55.2	24.4	116.6	125.5	90.6	85.6	37.2	86.3	68.4	53.4	3092.9	79.31		2404.9	80.16		1302.6	72.37
2019-06-12	108	13	112	22.8	16.4	28.5	38.7	98.2	204	206.2	217.4	174.6	133.4	152	111.8	85.9	143.8	121.9	60.6	84.8	155.4	48	35.6	93.8	86.2	49.2	57.4	56	46.4	47	29.3	78.8	33.8	48	60.6	161.6	43.4	33.8	47	36.4	44.8	3305.5	84.76		2796.1	93.2		2013	111.83
2019-06-12	109	14	57.6	8	1	1	6.2	58	121.4	187.9	190	196.4	157.7	113.6	68.6	141.5	77.8	125.9	82.6	99	175.2	58.2	124	111.2	110.4	119.4	120.2	52.5	124.2	137.2	65.9	78.4	129	145.2	152.6	78.2	163	123.6	111.5	146.2	174.2	4194.5	107.55		2971	99.03		1694.2	94.12
2019-06-12	110	15	49	145.9	257.3	255.3	246.7	270.2	170.4	144.6	94.4	57.9	98.3	36.2	46.6	115.7	175.8	177.2	173.8	144.8	177.5	92.4	164	150.3	34	105.6	170	80	44.2	68.2	77.1	114.6	83	86.2	144.2	99.6	72.8	59.6	72.2	87.6	40.9	4684.1	120.11		3938	131.27		2660.1	147.78
2019-06-13	106	16	49.8	59.8	45.2	49.4	48.8	45	47.8	46	40.6	44.7	52	53.8	48	53	53.6	53.6	46	44.8	51.4	51.8	52	45.4	44.8	44	41.8	42.6	45	47.8	54.2	53.4	58	60	57.4	57.2	56.8	54	53.2	51.2	63.4	1967.3	50.44		1456.1	48.54		881.9	48.99
2019-06-13	107	17	89.4	74.9	17.8	17.8	40.4	178	183.8	207	195	161.1	163.4	97.4	106.4	166.6	117.8	55.6	92.6	68.6	43.6	82.4	62.4	72.2	96.6	57.6	107.6	126.8	67.1	48.2	64.6	69	39.2	57.2	85.4	91	47	109.2	76.6	57.8	123.4	3618.5	92.78		2931.7	97.72		2033.6	112.98
2019-06-13	108	18	45	24.4	87.2	165.2	168.4	202.2	108.2	116.6	139.6	204.8	112	39.2	136.4	39	14.8	17	22.8	20.6	28.4	25.4	12.8	130	15	19.8	35.6	46	31.6	19.8	17	27.8	9	11.4	11	12.6	94.2	105.8	112	121.4	74.4	2624.4	67.29		2072.6	69.09		1663.4	92.41
2019-06-13	109	19	44.4	52.8	0.8	1.4	12.4	39.4	137.4	188.4	206	203.1	123.4	139.6	170.6	92.6	162.8	157.8	67.4	143.4	160.8	100.6	102.8	113.4	171.8	93.2	93.8	144.8	103.8	138.8	161.6	88.2	163.4	197.4	86	147	146.4	163.6	121.6	135	124.6	4702.3	120.57		3417.3	113.91		1943.7	107.98
2019-06-13	110	20	28.2	58.8	66.4	296.8	296.8	278	227.2	221	214.8	209.2	222.8	237.6	204.4	225.6	209.4	228.6	215.6	227.8	217.2	203.2	210.2	218.8	217.4	201.6	219.8	216.2	220.3	199.8	210.6	210.2	226.4	228.6	210.4	222.6	207.2	228.8	224.6	221.4	210	8194.3	210.11		6214.3	207.14		3669	203.83
2020-07-01	109	21	7.2	16.8	5.2	30.4	81.2	170.2	194.6	139.8	145	123.4	150.2	142.4	108	154.4	140.4	194.8	151.2	145.6	147.8	203.8	179.8	198.2	78.2	215	188.6	207.6	161.8	177.8	156.8	150.8	88	242.4	112.7	163.8	132	195.4	190.4	116.8	191.6	5600.1	143.59		4167	138.9		2100.8	116.71
2020-07-01	110	22	24	3.2	13.6	12	49.6	82.2	154.4	199.2	201.8	146.8	184.4	178.8	157.4	152	165.4	176.1	166.4	171.4	204.2	188.8	116.2	165.2	157.8	152.2	166.6	203.4	93	153.8	172.6	176.8	115.6	203.2	184.7	179.8	167.6	177	124	142.6	206.2	5690	145.9		4189.3	139.64		2238.7	124.37
2020-07-01	111	23	281.4	263.4	242.2	176.8	238.4	185.6	188.6	118.2	154.4	125	148.4	287.4	181.4	123.8	131.2	104.8	109.2	125.4	106	100.2	133.4	200.8	109.8	59.6	60.8	55.4	59.6	109	98.2	116.2	136.2	125.4	113	44.2	63	125.8	138	90.2	121.2	5351.6	137.22		4394.6	146.49		3185.6	176.98
2020-07-01	112	24	340.8	317.8	260.6	252.2	272.2	175	173.4	284	326.8	243.4	242.2	194	184.2	206.6	193.3	204.6	228.8	363.2	110	153	212.4	204.6	166.6	264.6	156.6	169.4	190.4	233.2	209	225.4	206.4	187.8	209.3	211.8	145.4	166.8	205.4	197.4	187.2	8475.8	217.33		6758.3	225.28		4463.1	247.95
2020-07-01	113	25	43.4	2.4	26.4	12.8	3.6	22	98.8	109	131.2	134	136.4	143.6	112.4	138.8	141.3	128	118	142.4	103.8	91.6	116.8	133	76.2	105.2	126.4	105.2	157.2	127.6	100.8	118.8	166.4	161.8	97.8	132.8	129.2	140.2	162.2	228.4	227.4	4453.3	114.19		3007.1	100.24		1644.5	91.36
2020-07-01	114	26	294	239.4	256.8	216.2	172.8	193.2	208.6	219.4	155	201.4	137.6	124	78.4	77.8	89.3	116.4	121.4	94	114	117.6	141.4	212	72.4	78.4	101.4	43.6	64	83.6	105.8	65.4	102.6	33.2	27.6	91.8	77.6	62.4	39.4	38.6	68.1	4736.6	121.45		4195.3	139.84		2995.7	166.43
		Average:	101.92	120.7	128.6	146.81	150.08	156.75	162.9	158.23	150.95	151.08	135.41	133.29	127.03	121.55	123.77	126.23	109.52	116.97	126.27	106.83	107.36	123.46	105.2	108.02	118.3	107.34	96.85	113.77	105.76	108.57	110.03	113.51	102.58	109.67	102.95	113.6	118.91	105.82	110.58	4737.19	121.47		3749.55	124.98		2421.82	134.54
		SEM:	16.59	20.29	21.59	21.52	19.74	15.25	9.75	11.52	12.99	10.71	10.31	13.17	9.7	11.23	11.81	13	11.82	14.32	11.28	11.94	11.1	11.89	11.22	13.45	10.27	11.74	10.47	11.92	11.61	12.25	13.2	13.32	12.27	11.58	9.64	12.32	12.52	11.81	12.69	332.23	8.52		264.5	8.82		175.48	9.75
MP-1207 (100 nmol, i.c.v.): RESPIRATION (in 50% DMSO/50% Saline (0.9%), 5ul i.c.v.) administered 5 min prior to placement in box.
Date:		Mouse		Average respiration (BPM) - Total for time period																																									With 150-min cut off:			With 90-min cut off:
			Start - 05:00	5:00 - 10:00	10:00 - 15:00	15:00 - 20:00	20:00 - 25:00	25:00 - 30:00	30:00 - 35:00	35:00 - 40:00	40:00 - 45:00	45:00 - 50:00	50:00 - 55:00	55:00 - 60:00	60:00 - 65:00	65:00 - 70:00	70:00 - 75:00	75:00 - 80:00	80:00 - 85:00	85:00 - 90:00	90:00 - 95:00	95:00 - 100:00	100:00 - 105:00	105:00 - 110:00	110:00 - 115:00	115:00 - 120:00	120:00 - 125:00	125:00 - 130:00	130:00 - 135:00	135:00 - 140:00	140:00 - 145:00	145:00 - 150:00	150:00 - 155:00	155:00 - 160:00	160:00 - 165:00	165:00 - 170:00	170:00 - 175:00	175:00 - 180:00	180:00 - 185:00	185:00 - 190:00	190:00 - 195:00	Total BPM:	Average BPM:		Total BPM:	Average BPM::		Total BPM:	Average BPM:
2018-10-30	101	1	216.7	182	194	148.4	140.2	124.2	208.2	143.2	133.4	62	72.6	77	70.6	87.4	105.2	192.8	145.4	99.6	20.8	34.8	46.8	37.2	33.8	38	39.2	99.2	104.6	88.8	55.8	71.6	73.6	52.8	56.6	56.6	82	102.4	74.8	95	82.8	3750.1	96.16		3073.5	102.45		2402.9	133.49
2018-10-30	102	2	222.4	236	241.8	235.8	190.6	171.6	141	201.2	112.8	102.4	156.6	63.6	111.4	96	172.4	82.8	18.2	76.8	53.8	61.6	89.4	93.4	122.8	80.8	81.4	45.8	108.4	139.8	179.4	47	67.8	71.8	56.8	128	146.2	61	86.8	65.4	100.2	4521	115.92		3737	124.57		2633.4	146.3
2018-10-30	103	3	106.4	169.4	205.4	208	180.4	172	119.8	106	129.4	96.8	58.4	68	126	143.4	143.2	83.2	74.8	112	32.8	85.4	65.8	84.5	58.6	78.6	111.4	117.6	160.6	159.2	53.8	37.4	46.8	79.2	42.8	82.8	57	78.4	66	99.8	168.8	4069.9	104.36		3348.3	111.61		2302.6	127.92
2018-10-30	104	4	76.8	22.2	14.6	15.8	8.6	6.2	24.8	37	74.8	104.2	138.2	58.6	123.4	52.2	136.6	129.4	57	54.8	100.6	144	42.6	77.9	62.2	79.6	76.4	80.2	86.4	77	96.2	78	95.2	102.6	100.8	91.6	133.2	107.6	107.6	128.8	156.6	3160.3	81.03		2136.3	71.21		1135.2	63.07
2018-10-30	105	5	73.6	40.6	33.6	38.8	34	58.8	88.8	110.2	109.4	94.2	99.8	110.4	94.4	129.6	107.4	97.2	119.8	105.4	135.4	122.2	146.4	146.6	84.6	85.4	102.6	89.4	104.2	115.8	128.4	120.8	120	132.6	97.4	107.8	115	112	117.4	122.2	106	3958.2	101.49		2927.8	97.59		1546	85.89
2018-10-30	106	6	90.7	161.2	237.8	181.8	181.2	191	226.6	132.4	111.4	60.4	117.2	148	119.6	53.2	45.4	109.2	80.8	176.6	79	129.2	38.2	50.9	86.4	18.8	22.2	7.4	17	24	40.4	28.6	24	12.4	9	51.8	83	101.8	105.2	32.8	18	3404.6	87.3		2966.6	98.89		2424.5	134.69
2018-10-30	107	7	87.8	20.4	12.2	21.2	12.8	6.4	10	38.6	53.8	74.4	89.6	54.4	97.8	60.2	60	44.8	64.8	45	96.4	49.4	134.2	116	96.8	145	159.2	82.4	46.4	114.8	60.2	87.8	105.4	118	77	69.8	108.4	106.4	110.8	89	101.6	2929.2	75.11		2042.8	68.09		854.2	47.46
2018-10-30	108	8	134.2	98.2	19	22	18.6	35.8	82.6	95.2	104	144.4	135	153.6	124.4	91.6	163.8	130.6	139.8	136.6	117.8	130.2	93.8	88.1	105.6	115	86.6	84.2	108.2	102	129	101.4	93	93.8	113	98.6	108	135	124.2	138.4	127.6	4122.9	105.72		3091.3	103.04		1829.4	101.63
2018-10-30	109	9	112.1	193.4	259.6	209	164.8	150.2	173.6	230.8	207.8	107.6	106.8	154.2	114.8	143.6	144.8	139.2	161.6	137.8	224.2	183.8	75	89.8	155.2	137.8	162.6	102.2	142	153.8	173.4	175	109	176	171.6	192.2	192.6	123	62.2	120	132	5965.1	152.95		4686.5	156.22		2911.7	161.76
2018-10-30	110	10	82.2	209.4	283.8	246.6	244.8	276.8	236.2	186.6	100.2	80.8	91	49.2	44.8	70.8	59.4	63	81.4	115	138.6	165.4	189.2	163.2	150.8	152.4	145	184.2	190.2	193.8	179	209.8	210.2	179.6	207.6	195.8	202.6	241.6	205	175.3	182	6383.3	163.67		4583.6	152.79		2522	140.11
		Average:	120.29	133.28	150.18	132.74	117.6	119.3	131.16	128.12	113.7	92.72	106.52	93.7	102.72	92.8	113.82	107.22	94.36	105.96	99.94	110.6	92.14	94.76	95.68	93.14	98.66	89.26	106.8	116.9	109.56	95.74	94.5	101.88	93.26	107.5	122.8	116.92	106	106.67	117.56	4226.46	108.37		3259.37	108.65		2056.19	114.23
		SEM:	17.52	25.67	36.38	30.72	28.26	28.4	25.44	20.48	12.86	7.89	9.7	13.78	8.45	11.2	14.5	13.55	14.39	12.6	18.82	15.94	15.83	12.26	12.45	14.08	15.06	14.46	16.07	15.21	17.61	18.62	15.9	16.55	18.93	16.14	14.89	15.34	12.97	12.6	15.06	358.87	9.2		279.41	9.31		216.11	12.01
MP-1208 (35 nmol, i.c.v.): RESPIRATION (in 80% DMSO/20% Saline (0.9%), 5ul i.c.v.) administered 5 min prior to placement in box.
Date:		Mouse		Average respiration (BPM) - Total for time period																																									With 150-min cut off:			With 90-min cut off:
			Start - 05:00	5:00 - 10:00	10:00 - 15:00	15:00 - 20:00	20:00 - 25:00	25:00 - 30:00	30:00 - 35:00	35:00 - 40:00	40:00 - 45:00	45:00 - 50:00	50:00 - 55:00	55:00 - 60:00	60:00 - 65:00	65:00 - 70:00	70:00 - 75:00	75:00 - 80:00	80:00 - 85:00	85:00 - 90:00	90:00 - 95:00	95:00 - 100:00	100:00 - 105:00	105:00 - 110:00	110:00 - 115:00	115:00 - 120:00	120:00 - 125:00	125:00 - 130:00	130:00 - 135:00	135:00 - 140:00	140:00 - 145:00	145:00 - 150:00	150:00 - 155:00	155:00 - 160:00	160:00 - 165:00	165:00 - 170:00	170:00 - 175:00	175:00 - 180:00	180:00 - 185:00	185:00 - 190:00	190:00 - 195:00	Total BPM:	Average BPM:		Total BPM:	Average BPM::		Total BPM:	Average BPM:
2018-10-26	101	1	92	43	55.8	80.4	84.2	76.6	81.8	116	103.2	124.4	108.6	132.4	102	99.2	99.6	106	121.6	94.4	108.2	120.7	90.6	121.6	98.4	123.4	126.6	133.6	129.2	153.6	155.8	160.4	192.2	178.2	166.8	163.4	190.6	185.6	194.8	216.4	207	4938.3	126.62		3243.3	108.11		1721.2	95.62
2018-10-26	102	2	158.8	193.6	197.2	209.8	178	130.2	113.4	55.4	76	95.2	72.2	65	186.2	139.8	169.4	145.4	63.6	33	41.2	50.4	58	58.4	39.2	47.2	76.8	208.2	138.8	132	22.6	26	30.4	41.6	121.8	114.8	38.2	34.2	42	55	65.6	3724.6	95.5		3181	106.03		2282.2	126.79
2018-10-26	103	3	137.2	149.4	267.4	210.8	177.4	176	192.8	153.6	154.2	172	110.2	75.2	144.8	98.6	172	182.8	169.4	139.8	84.2	113.5	131.2	95	74.4	54.4	64.8	68.8	105	59	91.6	179.6	87	21	43.4	86.2	56.4	74.9	76.2	107.6	132.8	4690.6	120.27		4005.1	133.5		2883.6	160.2
2018-10-26	104	4	134.8	38.4	33	65.4	190.2	226.6	241.2	176.8	147.8	162.4	148.2	124.4	102.4	131.8	91.8	142.8	95	120.4	140.4	106.8	121	138.4	126.8	157	178.2	124.2	187.6	125.6	137.8	123.4	143	150.6	174.2	171.6	70.4	134.5	167	178.6	169.6	5400.1	138.46		4040.6	134.69		2373.4	131.86
2018-10-26	105	5	86.8	42.8	45.4	39.2	31.4	32.2	58.2	91.2	115	99	93.2	96.4	82.2	66.4	89.2	91.2	90.6	79.8	90.9	83.5	91.6	102	95.8	100.4	103.6	96	97	105.8	71.4	129.6	102.8	80.6	79.6	139	124.8	98.5	134.4	142.2	132.6	3532.3	90.57		2497.8	83.26		1330.2	73.9
2018-10-26	106	6	108.6	41	39	41	140.2	231.2	238	205.6	168.2	192.4	201	176.6	183.2	170.6	192	171.2	169.4	165	153.4	153.4	153.8	125	116.6	122.2	147	154.6	154.4	146.2	153.6	143	110.4	146.8	166.6	144	138.8	167.5	139	129.8	150.4	5850.7	150.02		4557.4	151.91		2834.2	157.46
2018-10-26	107	7	128.4	69.4	45.6	33.8	41.2	89.8	141.2	152.2	97.8	97.8	106.6	106.6	75.2	67.6	91.8	115.8	107.2	92	103.9	96.6	75.4	101	95.8	93	99.6	111.6	131.8	172	124.6	78.4	113	144	138.4	140	106.6	128.4	187.8	161.8	153.6	4217.3	108.14		2943.7	98.12		1660	92.22
2018-10-26	108	8	129	28.8	20.8	13.6	12.2	14.6	23	48.2	67.4	95.6	81.6	70.2	57	49.6	77.8	96.4	90.2	71.8	85.6	92.4	82.6	90	88.4	91.6	83.8	92.6	103	95.4	103.4	93.8	84.2	116.6	153.2	162.4	164.4	146.6	180	180.8	155.2	3493.8	89.58		2150.4	71.68		1047.8	58.21
2018-10-26	109	9	52	18.6	152	220.2	233.6	190.6	166	175	150.2	158.6	99	87.4	90	207.4	154	141.8	122	39.6	45.8	129.8	74.6	121	183.2	110.8	32.4	87.4	78.8	139.8	102.2	114.6	175	109	104	142.6	141.4	199.4	175	110.6	39.2	4874.6	124.99		3678.4	122.61		2458	136.56
2018-10-26	110	10	64.2	24.2	193.4	202.6	230.2	191.6	170.8	209.6	203.4	210.8	182.8	181	100.2	192.8	162.2	66.4	59.6	90.6	209.6	56.3	63.8	60	42.4	157.4	146.6	40.4	53.2	40.6	76.2	61.2	140	116.4	159.8	168	145	107.1	66.6	109	110.8	4866.8	124.79		3744.1	124.8		2736.4	152.02
		Average:	109.18	64.92	104.96	111.68	131.86	135.94	142.64	138.36	128.32	140.82	120.34	111.52	112.32	122.38	129.98	125.98	108.86	92.64	106.32	100.34	94.26	101.24	96.1	105.74	105.94	111.74	117.88	117	103.92	111	117.8	110.48	130.78	143.2	117.66	127.67	136.28	139.18	131.68	4558.91	116.89		3404.18	113.47		2132.7	118.48
		SEM:	10.93	18.58	28.09	27.6	26.37	24.98	23.25	18.43	13.72	13.87	13.59	13.2	14.04	17.46	13.75	11.7	12.03	13	16.03	10.06	9.87	8.47	13.17	11.72	13.93	14.88	12.24	13.26	13.05	14.81	14.89	15.76	13.71	8.36	15.54	16.09	17.57	14.78	15.58	252.39	6.47		234.95	7.83		206.03	11.45
[truncated: 32 more columns]
